# **Ikaros family proteins regulate developmental windows in the mouse retina through convergent and divergent transcriptional programs**

Awais Javed<sup>1,2‡</sup>, Pierre Mattar<sup>1#</sup>, Allie Cui<sup>1</sup> and Michel Cayouette<sup>1,2,3,4,\*</sup>

<sup>1</sup>Cellular Neurobiology Research Unit, Institut de recherches cliniques de Montreal (IRCM), Canada.

<sup>2</sup>Molecular Biology Program, Université de Montréal, Canada.

<sup>3</sup>Department of Medicine, Université de Montréal, Canada.

<sup>4</sup>Department of Anatomy and Cell Biology; Division of Experimental Medicine, McGill University, Canada.

\*corresponding author: [michel.cayouette@ircm.qc.ca](mailto:michel.cayouette@ircm.qc.ca)

‡Present address: Department of Basic Neurosciences, Centre Medical Universitaire (CMU), Université de Genève, Switzerland.

#Present address: Department of Cell and Molecular Medicine, University of Ottawa, Canada.

## ABSTRACT

Temporal identity factors regulate the competence of neural progenitors to generate specific cell types in a time-dependent manner, but how they operate remains poorly defined. In the developing mouse retina, the Ikaros zinc finger transcription factor *Ikzf1* regulates the production of early-born cell types, except cone photoreceptors. In this study we show that *Ikzf4*, another Ikaros family protein, cooperates with *Ikzf1* to control cone photoreceptor production during early stages of retinal development, whereas at late stages, when *Ikzf1* is no longer expressed in progenitors, *Ikzf4* is instead required for Müller glia production. Using CUT&RUN sequencing, we find that both *Ikzf1* and *Ikzf4* generally bind to the same genes involved in cone development and other early-born fates, but at different cis-regulatory elements. In late-stage progenitors, *Ikzf4* re-localizes to bind target genes involved in Müller glia development and regulate their expression. Specifically, we show that *Ikzf4* maintains *Hes1* expression in differentiating cells using two *Ikzf* GGAA binding sites at the *Hes1* promoter, thereby favouring Müller glia fate commitment. These results uncover a combinatorial role for Ikaros family members in nervous system development and provide mechanistic insights on how they temporally regulate cell fate output.

## INTRODUCTION

Generation of cell diversity in the central nervous system (CNS) is a highly controlled and regulated process. Neural progenitors alter their potential to generate specific neurons and glia using both spatial and temporal patterning cues (Sagner and Briscoe, 2019). In the *Drosophila* nervous system, temporal patterning is regulated by the expression of transcription factors referred to as “temporal identity” factors, which control the developmental competence of neural progenitor cells, allowing cell-type production to change as development proceeds (Brody and Odenwald, 2000; Cleary and Doe, 2006; Erlik et al., 2017; Grosskortenhaus et al., 2005; Grosskortenhaus et al., 2006; Isshiki et al., 2001; Kambadur et al., 1998; Li et al., 2013; Novotny et al., 2002; Pearson and Doe, 2003). A classic example of temporal patterning in vertebrates is the developing mouse retina, where seven broad cell types are formed in sequential but overlapping manner from multipotent retinal progenitor cells (RPCs) (Rapaport et al., 2004; Young, 1985a, b). Retinal ganglion cells (RGCs), amacrine cells, cone photoreceptors and horizontal cells are mostly generated during the embryonic period of retinogenesis, whereas rod photoreceptors, bipolar cells, and Müller glia are primarily generated during the postnatal period (Carter-Dawson and LaVail, 1979a, b; Rapaport et al., 2004; Turner et al., 1990; Young, 1985a, b).

How exactly RPCs change competence over time to control retinal histogenesis remains poorly understood, although some progress was made in recent years (Davis et al., 2011; Decembrini et al., 2009; Dupacova et al., 2021; Georgi and Reh, 2010; Gordon et al., 2013; Iida et al., 2011; La Torre et al., 2013; Yang et al., 2003; Zibetti et al., 2019). Homologs of *Drosophila* temporal identity factors were found to regulate temporal patterning in mouse RPCs (Elliott et al., 2008; Javed et al., 2020; Mattar et al., 2015). Specifically, it was found that *Ikzf1* (*hunchback*), a member of the Ikaros family of zinc finger transcription factors, is necessary and

sufficient to confer competence to generate most early-born cell types, except cone photoreceptors (Elliott et al., 2008). More recently, the homolog of *Drosophila pdm/nub*, *Pou2f1*, was shown to play a part in the temporal regulation of cone photoreceptor production by upregulating *Pou2f2*, which in turn represses the rod determinant *Nrl* in photoreceptor precursors, thereby favouring the cone fate (Javed et al., 2020). Intriguingly, *Ikzf1* was found to upregulate *Pou2f1* expression, but because *Ikzf1* knockout retinas have normal numbers of cones, these results suggest that other, still unidentified factor(s), cooperate with *Ikzf1* in RPCs to confer competence to generate cones (Elliott et al., 2008).

Mechanisms regulating the production of late-born cell types also remain incompletely understood. The homolog of *Drosophila castor*, *Casz1*, another zinc finger transcription factor, confers competence to generate late-born rod and bipolar cells in the mouse retina, but suppresses the production of Müller glia - the latest-born cell type (Mattar et al., 2015). Similarly, while *Foxn4* was found to operate downstream of *Ikzf1* and upstream of *Casz1* to regulate mid-late temporal identity (Liu et al., 2020), it is not involved in Müller glia production. Instead, the temporal regulation of Müller glia production in the developing mouse retina is largely achieved by *Nfi* family of transcription factors (Clark et al., 2019), which are required to promote glial differentiation genes, even when expressed in early-stage RPCs that do not normally generate glia (Lyu et al., 2021). It remains unknown, however, how exactly *Nfi* factors are upregulated during late stages of retinogenesis to control glia production. Additionally, *Sox9*, *Vsx2* and *Sox2* are sufficient and required for Müller glia fate determination, but as they are expressed throughout retinal development, it is unclear how their pro-glial activities are gated (Lin et al., 2009; Livne-bar et al., 2006; Poche et al., 2008; Surzenko et al., 2013; Taranova et al., 2006).

There are five members of the *Ikaros* family of transcription factors in mice, which are homologous to the *Drosophila hunchback* gene, four of which are expressed in the developing

retina (Elliott et al., 2008). Aside from *Ikzf1*, however, the role of Ikaros family members in the mammalian CNS has not been explored. We therefore wondered whether other Ikaros family members might contribute to regulate RPC competence during mouse retinogenesis.

We show here that *Ikzf4* cooperates with *Ikzf1* during early stages of retinogenesis to regulate cone development. Using Cleavage Under Target & Release Under Nuclease (CUT&RUN) sequencing, we report that *Ikzf1* and *Ikzf4* bind to different regulatory elements associated with the same sets of early cell type differentiation genes, including cone genes. While *Ikzf1* expression is turned off at later stages of retinal development, *Ikzf4* expression is maintained and regulates Müller glia development. Mechanistically, we find that *Ikzf4* binds and regulates expression of several gliogenic genes, such as Notch targets and *Nfia/Nfib*. More specifically, we show that *Ikzf4* binds to two specific 'GGAA' Ikaros binding motifs in the *Hes1* promoter that are essential for its regulatory activity. These results provide evidence of combinatorial roles for *Ikzf1* and *Ikzf4* during retinogenesis that regulates cell fate in a context- and temporal-dependent manner.

## RESULTS

### **Ikzf4 is expressed in retinal progenitor cells at all stages of retinogenesis**

We previously reported expression of *Ikzf4* transcripts in the retina using in situ hybridization (Elliott et al., 2008), but the protein expression pattern remained unknown. To fill this knowledge gap, we characterized a commercially-available anti-*Ikzf4* antibody. First, we electroporated CAG:GFP or CAG:*Ikzf4*-IRES-GFP vectors in E17 mouse retinas and immunostained retinal sections two days later with the *Ikzf4* antibody. As expected, we found that the antibody recognizes overexpressed *Ikzf4* proteins (Fig. S1A-C'). Second, to ensure that the antibody is specific for *Ikzf4*, we immunostained retinas isolated from *Ikzf4*<sup>+/+</sup> and *Ikzf4*<sup>-/-</sup> (RIKEN Bioresource [RRID: IMSR\\_RBRC06808](#)) mouse embryos at E12, E15 and P9. We found that *Ikzf4* is expressed in virtually all retinal cells at E12 and E15, whereas it is restricted to a few retinal cell subtypes at P9 (Fig. S1D-H). No immunostaining signal was detected in the *Ikzf4*<sup>-/-</sup> retinas, indicating that the antibody specifically recognizes *Ikzf4* (Fig. S1D-H'). Based on this expression pattern, we suspected that *Ikzf4* was expressed in RPCs. Accordingly, we found that virtually all proliferating Ki67<sup>+ve</sup> RPCs also stained for *Ikzf4* at embryonic stages (Fig. 1A-D), and many Ki67<sup>+ve</sup> cells also co-labelled with *Ikzf4* at P0 and P2 (Fig. 1E-F), indicating that *Ikzf4* is expressed in RPCs throughout development.

We next compared our immunostaining data for *Ikzf4* with published scRNA-seq datasets in the developing mouse and human fetal retinas (Clark et al., 2019; Lu et al., 2020). Focusing on the RPC population, we generated UMAP plots by sub-setting the RPC populations at various developmental stages. We found that *Ikzf4/IKZF4* mRNA is expressed in both early and late RPCs (Fig. S1I-J), consistent with our immunostaining results. In addition to RPCs, we found *Ikzf4/IKZF4* expression in some differentiated retinal cell type clusters like rods, amacrine,

horizontal, and retinal ganglion cells (Fig. S2A-B). This suggests that *Ikzf4* is expressed in the mouse and human retina throughout development.

To assess expression of *Ikzf4* in mature cells, we used cell-type specific antibodies at P7. We detected expression of *Ikzf4* in early-born cell types such as *Lim1*<sup>+ve</sup> horizontal cells, *Brn3a*<sup>+ve</sup> RGCs, *Pax6*<sup>+ve</sup> amacrine cells and *S-opsin*<sup>+ve</sup> cone photoreceptors (Fig. 1G-H'''). We could also detect weak *Ikzf4* immunostaining in *S-opsin*<sup>-ve</sup> cells in the ONL, suggesting some expression in rod photoreceptors (Fig. 1 H'-H''). These results are consistent with our *Ikzf4/IKZF4* expression analysis in scRNA-seq datasets (Clark et al., 2019; Lu et al., 2020) (Fig. S2A-B). Interestingly, we also found *Ikzf4* expression in *Nfia/b*<sup>+ve</sup> cells that are either *Chx10*<sup>-ve</sup> or *Chx10*<sup>+ve</sup> (Fig. 1I-I'''), likely representing Müller glia and bipolar cells, respectively. Taken together, these data indicate that *Ikzf4* is detected in all early-born cell types and in some late-born cell types.

### ***Ikzf4* overexpression in late-stage retinal progenitors promotes immature cone and Müller glia production**

We next investigated the function of *Ikzf4* in the developing mouse retina. We first misexpressed *Ikzf4* in late-stage RPCs and asked if this would be sufficient to induce early-born cell type production. We infected P0 retinal explants with retroviral vectors expressing Venus or *Ikzf4*-IRES-Venus, and analyzed individual clone compositions 14 days later. We used *Rxrg* staining to identify cone photoreceptors, and cell morphology combined with nuclear layer position to identify other cell types, as we did previously (Elliott et al., 2008; Javed et al., 2020). We found many *Venus*<sup>+ve</sup>/*Rxrg*<sup>+ve</sup> cells located in the ONL in *Ikzf4*-IRES-Venus infected clones (Fig. 2A-C'), suggesting that *Ikzf4* is sufficient to promote cone photoreceptor production outside their normal window of development. Consistently, we observed an increase in the proportion of *Venus*<sup>+ve</sup> cells that co-stained for *Rxrg* in *Ikzf4*-infected retinas, as well as an increase in Müller

glia (Fig. 2D, E), which was accompanied by a decrease in rods, both as a proportion of all cells analyzed and as number of rods per clone (Fig. 2F). Reinforcing this finding, we observed a reduction in *Nrl* and *Nr2e3* transcript levels, two rod-specific genes, and an increase in *Rxrg* expression in the GFP<sup>+</sup> cell population 6 days after electroporation of CAG:Ikzf4-IRES-GFP in P0 retinal explants (Fig. 2G). The number of GFP<sup>+</sup> cells in the ONL that stain for *Nrl* and *Nr2e3* was also reduced following *Ikzf4* expression (Fig. 2H-N).

As we found that the number of small clones is increased following *Ikzf4* expression (Fig. 2F), we postulated that *Ikzf4* might promote precocious cell cycle exit or cell death. To distinguish between these possibilities, we electroporated CAG:GFP or CAG:Ikzf4-IRES-GFP vectors in P0 retinas. After culturing retinal explants for 2 days, we added EdU for 2 hours then fixed and stained the explants for GFP and EdU. We observed a significant decrease in EdU<sup>+</sup>GFP<sup>+</sup> cells after expression of *Ikzf4* (Fig. 2O-R). As we found no change in the number of cells staining for cleaved Caspase-3 (Fig. S3A-C'), we conclude that *Ikzf4* expression reduces clone size by promoting early cell cycle exit, rather than cell death. Finally, we also found that most 1- and 2-cell clones in the *Ikzf4* condition contain either cones or Müller glia, whereas control clones contain mostly rods (Fig. S3D-E). Together, these results suggest that *Ikzf4* is sufficient to promote cones and Müller glia production at the expense of rods when expressed in late RPCs.

To buttress the retroviral lineage tracing results and provide more in-depth analysis of the cell types produced, we electroporated retinal explants with either CAG:GFP or CAG:Ikzf4-IRES-GFP at P0 and determined the identity of GFP<sup>+</sup> cells 14 days later using immunostaining for cell-type specific markers. As observed with retroviral vectors, we found that *Ikzf4*-electroporated retinas contain more *Rxrg*<sup>+</sup> cells in the ONL compared to the control CAG:GFP (Fig. S3F-I). Intriguingly, however, the GFP<sup>+</sup>*Rxrg*<sup>+</sup> cells did not stain for the mature cone



markers S-opsin, M-opsin or PNA (Fig. S3J-M'). We therefore wondered whether these GFP<sup>+</sup>Rxrg<sup>+</sup> cells might be mis-localized retinal ganglion cells (RGCs), which also express Rxrg (Mori et al., 2001). We co-immunostained sections of *Ikzf4*-electroporated retinas with GFP, Rxrg, and the RGC markers Brn3a and Brn3b. We found that *Ikzf4* induces production of Rxrg<sup>+</sup> cells that do not express Brn3a or Brn3b, indicating they are not RGCs (Fig. S3N-Q'). Instead, *Ikzf4*-expressing GFP<sup>+</sup> cells in the ONL co-labelled with Crx/Otx2, which specifically labels photoreceptor cells in this layer (Fig. S3R-T'). Thus, overexpression of *Ikzf4* in late-stage RPCs is sufficient to induce production of cone photoreceptors that remain incompletely differentiated.

Similar to what we observed with retroviral vectors, we observed an increase in Müller glia production after overexpression of *Ikzf4*-IRES-GFP at P0, as determined by the GFP<sup>+</sup>Sox2<sup>+</sup> cells, GFP<sup>+</sup>Hes1<sup>+</sup>Chx10<sup>-</sup> and GFP<sup>+</sup>Lhx2<sup>+</sup>Nfia/b<sup>+</sup> cells found in the INL (Fig. S3U-Y'). These results indicate that, in addition to immature cones, *Ikzf4* promotes production of Müller glia when expressed in late-stage RPCs.

### ***Ikzf4* is required for Müller glia development**

Based on the above results, we hypothesized that *Ikzf4* may be required for cone and Müller glia development. We therefore analyzed retinas from *Ikzf4*<sup>+/+</sup>, *Ikzf4*<sup>+/-</sup>, and *Ikzf4*<sup>-/-</sup> mice and quantified the various retinal cell types using specific markers at P10, a stage when cell genesis is largely complete. While we found no change in the number of RGCs (Brn3a<sup>+</sup>), amacrine cells (Pax6<sup>+</sup>), horizontal cells (Lim1<sup>+</sup>) or bipolar cells (Otx2<sup>+</sup>), we observed a reduction in Sox2<sup>+</sup> and Lhx2<sup>+</sup> cells in the INL of *Ikzf4*<sup>-/-</sup> retinas compared to *Ikzf4*<sup>+/+</sup> and *Ikzf4*<sup>+/-</sup> retinas (Fig. 3A-C). Surprisingly, we found no difference in the number of Rxrg<sup>+</sup> cells in the ONL in *Ikzf4*<sup>-/-</sup> retinas compared to control *Ikzf4*<sup>+/+</sup> (Fig. 3C). These results indicate that *Ikzf4*

is required for Müller glia development, but dispensable for cone photoreceptor production, even though it is sufficient to induce immature cone production from late RPCs.

### **Ikzf4 cooperates with Ikzf1 to control cone photoreceptor development**

We have previously shown that inactivation of *Ikzf1* decreases early-born cell type production, with the exception of cone photoreceptors, which are unaltered in *Ikzf1* KO mice (Elliott et al., 2008). As *Ikzf1* and *Ikzf4* are expressed in the same cells as early as E11 (Fig. S4A-D), we wondered whether *Ikzf1* and *Ikzf4* might genetically cooperate to regulate cone development. To test this idea, we generated double knockout mice of *Ikzf1* and *Ikzf4*. Interestingly, when both alleles of *Ikzf1* were knocked out together with one or two alleles of *Ikzf4* (*Ikzf1*<sup>-/-</sup>;*Ikzf4*<sup>+/-</sup> and *Ikzf1*<sup>-/-</sup>;*Ikzf4*<sup>-/-</sup>), embryos were paler and exhibited reduced liver size compared to *Ikzf1*<sup>+/-</sup>;*Ikzf4*<sup>-/-</sup> and *Ikzf1*<sup>+/-</sup>;*Ikzf4*<sup>+/-</sup> embryos (Fig. S4E-H). Moreover, we found that *Ikzf1*<sup>-/-</sup>;*Ikzf4*<sup>+/-</sup> and *Ikzf1*<sup>-/-</sup>;*Ikzf4*<sup>-/-</sup> mice die at early postnatal stages, usually before P2, whereas single *Ikzf1*<sup>-/-</sup> or *Ikzf4*<sup>-/-</sup> mice are viable, showing functional redundancy for survival. Therefore, we focused our analysis of the retina at embryonic stages.

We first quantified cone numbers using Rrg immunostaining at E15, when cone genesis is at its peak. While we found no difference in cone photoreceptor numbers between most genotypes analyzed, we found a significant reduction in cone numbers in *Ikzf1*<sup>-/-</sup>;*Ikzf4*<sup>-/-</sup> double knockout animals (Fig. 3D-F), indicating that *Ikzf1* and *Ikzf4* cooperate to control cone photoreceptor development. We also asked whether *Ikzf4* might function with *Ikzf1* to regulate production of other early-born cell types, which are only mildly decreased in *Ikzf1* KO retinas (Elliott et al., 2008). As expression of specific amacrine and horizontal cell markers generally come on at postnatal stages (Clark et al., 2019) when double knockout animals are lethal, we focused our attention on RGC production, as *Brn3b* is robustly expressed at E15.5 (Xiang, 1998). We found that the number of RGCs was reduced in *Ikzf1*<sup>-/-</sup>;*Ikzf4*<sup>+/-</sup>, consistent with our

previously-published data (Elliott et al., 2008), but this RGC loss was not exacerbated in *Ikzf1*<sup>-/-</sup>; *Ikzf4*<sup>-/-</sup> double knockout animals. Taken together, these results show that *Ikzf1* and *Ikzf4* cooperate to regulate cone, but not RGC development.

### ***Ikzf1* and *Ikzf4* regulate genes involved in early-born cell type production**

To explore how *Ikzf1* temporally reprograms late-stage RPCs, we misexpressed *Ikzf1* in P0 retinas and carried out CUT&RUN and RNA-sequencing, as schematized (Fig. 4A). In parallel, we performed CUT&RUN on E14 and P0 retinal extracts using a previously-validated anti-*Ikzf4* antibody (S1A-H'). Using MACS2 peak calling on the CUT&RUN datasets, we found 1787 *Ikzf1* peaks, 2472 *Ikzf4* peaks at E14, and 2130 *Ikzf4* peaks at P0 (Fig. S5A). When we intersected the peaks between the *Ikzf1* and *Ikzf4* E14 and P0 datasets using bedtools (Quinlan and Hall, 2010), we only found a few overlapping (Fig. S5A), suggesting that *Ikzf1* and *Ikzf4* do not bind to the same cis-regulatory elements (CREs) in RPCs. We next assessed the CUT&RUN feature distribution using CHIPSeeker to annotate the peaks (Yu et al., 2015). We found that *Ikzf1* binding was mostly observed in intergenic and intronic regions, away from the promoters (Fig. S5B), similar to what was previously reported in B-cells (Schwickert et al., 2014). On the other hand, *Ikzf4* binding, both at E14 and P0, was primarily observed at promoters. We further analyzed *Ikzf1* and *Ikzf4* binding peaks by performing Hypergeometric Optimization of Motif EnRichment (HOMER) to discover transcription factor motifs present in the dataset (Heinz et al., 2010). We found that the canonical *Ikzf* binding motif 'GGAA' or the complementary sequence is present in *Ikzf1* and *Ikzf4* CUT&RUN datasets (Fig. S5C), as previously reported for *Ikzf* family members (Molnár and Georgopoulos, 1994). Taken together, these data suggest that *Ikzf1* binds to GGAA motifs in distal and intronic CRE, whereas *Ikzf4* binds to GGAA motifs close to promoters.

We next asked whether *Ikzf1* and *Ikzf4* might bind the same genes, but at different CREs. We first curated the top differentially expressed genes by comparing the RNA-seq datasets from the CAG-GFP and CAG-*Ikzf1*-transfected RPCs using DESeq2 (Fig. 4A, Supplementary file 1). We performed gene ontology (GO) enrichment using GONet to find the top biological processes affected by *Ikzf1* misexpression (Pomaznoy et al., 2018). In the upregulated list, we found many genes associated with retinal ganglion cells and amacrine cell development, such as *Tfap2b*, *Pou4f1*, *Isl1*, *Dll1/4* and *Pax6* under the GO biological process “animal organ development”, as expected since *Ikzf1* promotes these early-born cell fates (Fig. S5D, Supplementary file 2) (Elliott et al., 2008). Conversely, in the downregulated list, we found many genes associated with bipolar and Müller glia development such as *Hes1*, *Irx3*, *Notch1/3*, *Rbpj*, *Sox2*, *Sox8* and *Sox9* under the GO biological process “negative regulation of nervous system development” (Fig. S5D, Supplementary file 2). We also found the late temporal factor *Casz1* in the same GO biological process, consistent with our previously published results that *Ikzf1* represses *Casz1* (Mattar et al., 2015). To narrow down the list of target genes, we next compared the list of significantly altered transcripts in *Ikzf1* misexpression RNA-seq to that of bound regions in *Ikzf1* CUT&RUN using Genomic Regions Enrichment of Annotations Tool (GREAT) (McLean et al., 2010). We found around 1000 total upregulated and downregulated transcripts that are bound by *Ikzf1* (Fig. 4B). Out of these, retinal ganglion cell and amacrine cell development genes were enriched in the upregulated category, whereas bipolar cell and Müller glia development genes were enriched in the downregulated category, consistent with *Ikzf1* functioning as an early temporal identity factor (Supplementary file 1).

We next compared *Ikzf1* RNA-seq/CUT&RUN target gene list with the *Ikzf4* CUT&RUN E14/P0 target gene list to find common genes regulated by both *Ikzf* factors. After performing peak to gene annotation using GREAT, we observed over 150 genes regulated and bound by *Ikzf1* that are also bound by *Ikzf4* (Fig. 4B). In the upregulated category, we observed genes

associated with cone photoreceptor development also bound by *Ikzf1* and *Ikzf4*, such as *Kif2a*, *Nr2f2*, and *Sall3* (de Melo et al., 2011; Kallman et al., 2020; Satoh et al., 2009), and amacrine/ganglion/horizontal cell development, such as *Bhlhe22*, *Nr4a2*, *Dll1*, *Pax6*, *Tfap2b* and *Dab1* (Feng et al., 2006; Jiang and Xiang, 2009; Jin et al., 2015; Marquardt et al., 2001; Rice and Curran, 2000; Riesenberger and Brown, 2016) (Fig. 4C). These results suggest that *Ikzf1* and *Ikzf4* have common target genes that control the production of cones and other early-born cell types, although they bind different CREs of these genes (Fig. S5A). Conversely, the downregulated category contained genes bound by both *Ikzf1* and *Ikzf4* and involved in late-born cell type production such as *Casz1*, *Irx3/5/6*, *Sox2/9*, *Nfib* and *Vsx2*, as represented by volcano plot for gene expression and IGV genomic tracks for CUT&RUN binding peaks (Fig. 4D-E). Together, these data suggest that *Ikzf1/ikzf4* both repress and promote expression of genes involved in late- or early-born cell production, respectively.

We previously showed that *Ikzf1* upregulates *Pou2f1* when overexpressed in early-stage retina, but not when misexpressed in late-stage retinas (Javed et al., 2020). *Pou2f1* in turn promotes *Pou2f2* expression, which then represses the rod-promoting transcription factor *Nrl* to favour cone development (Javed et al., 2020). Because *Ikzf1* cooperates genetically with *Ikzf4* to promote the cone fate, we wondered whether *Ikzf4* might also upregulate *Pou2f1/2* expression. As we misexpressed *Ikzf1* in late-stage retinas, we did not observe upregulation of *Pou2f1/2* in *Ikzf1* RNA-seq or found peaks at *Pou2f1/2* in *Ikzf1* CUT&RUN (data not shown). On the other hand, *Ikzf4* CUT&RUN analysis at E14 revealed that *Ikzf4* binds at a region of open chromatin 47kbp upstream of the *Pou2f2* promoter (but did not bind regulatory regions associated with *Pou2f1*), which was scored as a significant *Pou2f2*-associated peak by GREAT (Fig. 4F). To test whether *Ikzf4* regulates *Pou2f2* expression, we electroporated P0 retinas with either CAG:GFP or CAG:*Ikzf4*-IRES-GFP and sorted GFP+ cells 18 hours later to perform RT-qPCR. We found that *Ikzf4* upregulates transcript levels of *Pou2f2*, whereas there is no change

in the expression of temporal identity factors such as *Cas21v1*, *Cas21v2*, and *Foxn4*, which are regulated by *Ikzf1* (Fig. 4G) (Liu et al., 2020; Mattar et al., 2015). These results suggest that *Ikzf4* promotes cone development, at least in part, by binding and upregulating *Pou2f2* gene expression, in addition to other genes discussed above. To test whether *Ikzf4* requires *Pou2f2* to promote cone production, we co-electroporated *Ikzf4*-IRES-GFP with either shControl or sh*Pou2f2* in P0 retinal explants and analyzed cones generated 12 days later. We found a significant decrease in the number of GFP<sup>+</sup>Rxrg<sup>+</sup> cells in the ONL when *Pou2f2* was knocked-down concomitantly with *Ikzf4* expression (Fig. 4H-J). These results show that *Ikzf4*, similar to *Pou2f1*, requires *Pou2f2* to promote cone development, suggesting a transcriptional cascade in which *Ikzf4* activates *Pou2f2* expression to repress *Nrl* and favour cone production.

### **Ikzf4 binds and upregulates genes involved in Müller glia production**

We next asked how *Ikzf4* could regulate Müller glia production during late stages of retinogenesis. We first investigated stage-specific peaks for *Ikzf4* at E14 and P0. We computed the overlapping binding peaks between E14 and P0 stages using bedtools. We labelled *Ikzf4* binding peaks found only at the E14 stage as ‘E14 exclusive’, those found only at P0 stage as ‘P0 exclusive’, and those found at both E14 and P0 as ‘Common’ peaks. We noticed that, out of the total binding peaks at each stage, only 1010 peaks were ‘Common’ (Fig. 5A, Supplementary file 3). To identify the genes associated with the E14 exclusive, P0 exclusive and Common binding peaks, we performed GO classification using GREAT and annotated the top 5 GO biological processes (McLean et al., 2010). In the top 5 GO biological processes for all three categories, we found “Positive regulation of Notch signaling pathway” only in P0 exclusive peaks (Fig. 5A), suggesting a prominent role of *Ikzf4* in the regulation of Notch signaling during late retinogenesis.

To gain insights on how *Ikzf4* might promote Müller glia development, we assessed genes enriched in the Müller glia cluster within P14 scRNA-seq data (Clark et al., 2019). Remarkably, we found *Ikzf4* binding peaks in all of the top 8 genes enriched in the Müller glia cluster (Fig. S6A). However, as late RPCs and Müller glia have similar transcriptomes (Blackshaw et al., 2004; Roesch et al., 2008), these genes are also expressed in RPCs, complicating the interpretation of these results. Therefore, we focused our analysis on genes that are required for Müller glia development. We found *Ikzf4* binding signal at genomic regions around *Sox8*, *Sox9*, *Lhx2*, and *Nfia/b/x* gene bodies, some of which were called as peaks by MACS2 (Fig. 5B) (Clark et al., 2019; de Melo et al., 2018; de Melo et al., 2016; Muto et al., 2009; Poche et al., 2008; Zibetti et al., 2019). In contrast, we did not find *Ikzf4* binding at other intronic open chromatin regions in gene bodies of *Nfib*, *Nfix*, and *Nrl*, which are highly expressed at P0, showing the specificity of the identified *Ikzf4* binding sites (Fig.S6B).

Next, we performed Transcription factor Occupancy prediction By Investigation of ATAC-seq Signal (TOBIAS) on open chromatin regions bound by *Ikzf4* at E14 and P0 to assess transcription factor motif footprints (Bentsen et al., 2020). We found that, out of the 849 motifs analysed from JASPAR database (Fornes et al., 2020), motifs of transcription factors associated with Müller glia differentiation such as *Lhx* family, *Sox* family and *Nfib* were differentially enriched in P0 open chromatin regions with *Ikzf4* binding compared to E14 (Supplementary file 4, Fig. S6C-D). We also found that, in the P0 retina, *Ikzf4* binds to open chromatin regions that are active or poised enhancers, as suggested by the enrichment of H3K27ac and H3K4me3 histone marks, respectively (Creyghton et al., 2010; Orford et al., 2008), and depletion of the H3K27me3 histone mark (Aldiri et al., 2017; Cao et al., 2002) (Fig. S6E). Therefore, these data suggest that *Ikzf4* binds to CREs important for Müller glia differentiation at late stages of retinal development.

We then assessed whether *Ikzf4* regulates transcripts of genes involved in Müller glia development by electroporating P0 retinas with either CAG:GFP or CAG:*Ikzf4*-IRES-GFP and carried out RT-qPCR on sorted GFP+ cells 18 and 72 hours later. We found that *Ikzf4* promotes expression of *Sox8* and *Sox9* at 18 hours post-electroporation. Although we found no change in *Lhx2*, *Rnf12*, *Nfia/b/x*, or *Ldb1* at 18 hours (Fig. 5C), their expression was increased 72hours after electroporation (Fig. 5D). To validate these RT-qPCR results, we electroporated P0 retinal explants with the same vectors and stained sections for *Nfia/b* 72hours later. As expected, we found a significant increase in the number of GFP<sup>+ve</sup> cells stained for *Nfia/b* (Fig. 5C-H). These results suggest that *Ikzf4* promotes Müller glia production by binding to and upregulating genes involved in glial cell specification, including the *Nfi* temporal identity factors.

#### ***Ikzf4* upregulates *Hes1* by binding to a consensus Ikaros binding site in the promoter**

In our CUT&RUN data, we noticed that the *Hes1* and *Hes5* promoters are highly bound by *Ikzf4*, both at early and late stages of retinogenesis. It was previously shown that *Hes1* expression oscillates during progenitor proliferation (Shimojo et al., 2008). Interestingly, *Hes1* expression decreases when the RPCs exit the cell cycle and is repressed in cells fated to become neurons, whereas it is maintained in cells fated to become glia (Furukawa et al., 2000; Imayoshi et al., 2013). To study the dynamics of *Ikzf4* binding at the *Hes1* and *Hes5* promoter, we co-electroporated reporter constructs p*Hes1*-dsRed or p*Hes5*-dsRed together with either CAG:GFP or CAG:*Ikzf4*-IRES-GFP in P0 retinas. We tracked the electroporation patches over time to assess the dynamics of dsRed expression, which reports activity of the promoters. We observed that *Ikzf4* promotes the activity of the *Hes1* promoter compared to the control GFP at 48 and 72 hours (Fig. S7A-D’). Even 6 days after electroporation, *Ikzf4*-electroporated retinas maintained high expression of dsRed, whereas expression of dsRed was reduced in the control GFP condition (Fig. S7E-F’). In contrast, we did not observe similar dynamics in dsRed expression for the *Hes5* promoter at 48hours or 6 days after *Ikzf4* electroporation compared to



the GFP control (Fig. S7G-J”). Of note, *Ikzf4*-mediated upregulation of the *Hes1* promoter activity appears to be specific to retinal cells, as *Ikzf4* had no effect on pHes1-dsRed activity in HEK293 cells (Fig. S7K-L”). We next assessed whether the increase in *Hes1* promoter activity leads to an increase in Hes1 protein expression. To test this, we electroporated P0 retinas with either CAG:GFP or CAG:*Ikzf4*-IRES-GFP and analyzed the number of GFP<sup>+ve</sup> cells staining for Hes1 in retinal sections 44 hours later. As expected, we observed an increase in the number of GFP<sup>+ve</sup>Hes1<sup>+ve</sup> cells after *Ikzf4* expression (Fig. 6A-C). Together, these results indicate that *Ikzf4* activates the *Hes1* promoter, which leads to elevation of Hes1 protein expression in a larger proportion of cells.

Finally, we sought to identify the *Ikzf4* binding sites required for the regulation of *Hes1*. When we analyzed the *Hes1* promoter region containing the *Ikzf4* peaks, we found three ‘GGAA’ *Ikzf* binding motifs (Fig. 6D). To study the functional requirement of these motifs, we mutated each one and assessed how this affected the ability of *Ikzf4* to regulate the activity of the *Hes1* promoter. We co-electroporated CAG:GFP or CAG:*Ikzf4*-IRES-GFP with either the WT or mutated *Hes1* promoter constructs (Fig. 6E). When we mutated binding site 1 (mut1), 2 (mut2) or 3 (mut3) and electroporated with CAG:GFP, we observed a reduction in dsRed signal compared to the WT construct (Fig. 6F-Q’), confirming the importance of these sites for the activity of the *Hes1* promoter. However, co-expression of *Ikzf4* was sufficient to promote dsRed expression, albeit less so for mut2 (Fig. 6F’-Q’). This suggests that none of these sites alone is required for *Ikzf4* binding and activation of the *Hes1* promoter (Fig. 6F-Q’). Interestingly, however, we found that when we mutated sites 2 and 3 together (mut2+mut3), *Ikzf4* was no longer able to activate the *Hes1* promoter (Fig. 6R-T’). Taken together, these results show that *Ikzf4* binds at two ‘GGAA’ sites that are required for the sustained expression of *Hes1* in post-mitotic cells.



## DISCUSSION

Neural diversity in the CNS is generated by a combination of spatial and temporal factors working in concert to establish the vast repertoire of neurons and glia. While factors regulating fate decisions upon cell cycle exit have been extensively studied, much less is known about how neural progenitors alter their developmental competence over time. In this study, we show that *Ikzf4* cooperates with the previously identified early temporal identity factor *Ikzf1* to control the production of both early-born cone photoreceptors and late-born Müller glia. Mechanistically, we report that, during early stages of development, *Ikzf1* and *Ikzf4* are both expressed in RPCs and generally bind the same target genes involved in cone specification, but at different CREs. At late stages, *Ikzf1* is no longer expressed, but *Ikzf4* expression is maintained and switches targets to bind genes involved in Müller glia development, including *Sox8*, *Sox9*, *Lhx2*, *Nfi*, and the Notch signaling effector *Hes1*. *Ikzf4* induces sustained expression of *Hes1* during differentiation via two 'GGAA' *Ikzf* binding sites in the promoter. Taken together, this study identifies functional cooperation between *Ikaros* family proteins and dynamic regulation of target gene selection as key mechanisms underlying temporal patterning in neural progenitors (Fig. 7).

### ***Ikzf1* and *Ikzf4* in the control of cone development**

Single knockout retinas of *Ikzf1* or *Ikzf4* have normal number of cones (Fig. 3C) (Elliott et al., 2008), but here we report that double knockouts of *Ikzf1* and *Ikzf4* have fewer cones, suggesting genetic redundancy for cone production. Although we find that *Ikzf1* and *Ikzf4* bind different CREs, we also report general co-binding at the same genes, such that inactivation of only one factor likely leads to compensation by the other factor in cone gene regulation. It remains unclear, however, whether *Ikzf1* switches its binding profile upon loss of *Ikzf4* and vice versa. A comprehensive analysis of genomic binding of *Ikzf* family members in KO retinas lacking other *Ikzf* factors will be required to explore this possibility.

Our data indicate that *Ikzf4* acts upstream of *Pou2f2* to initiate cone genesis at the appropriate developmental time. We observe an increase in *Rxrg*<sup>ve</sup> cells when *Ikzf4* is expressed in late RPCs, suggesting that *Ikzf4* is sufficient to reopen a window of competence for cone genesis that is normally lost at this stage. However, *Ikzf4* expression in late RPCs does not lead to the production of mature cones, unlike *Pou2f1* (Javed et al., 2020). This suggests that *Ikzf4* is able to promote cone genesis, but likely requires additional factors that are missing at late stages of retinogenesis to induce their full maturation. *Ikzf4* also promotes early cell cycle exit, which is uncharacteristic of temporal identity factors like *Ikzf1*, *Pou2f1* and *Casz1*, but not *Foxn4* (Elliott et al., 2008; Javed et al., 2020; Li et al., 2004; Mattar et al., 2015). Altogether, our results show that *Ikzf4* is an important part of a gene regulatory network that confers RPCs with the competence to generate cones.

### ***Ikzf4* in the regulation of Müller glia production**

Our data indicate that *Ikzf4* switches transcriptional targets at late stages of retinogenesis to control Müller glia production. One possible mechanism to explain this switch is that *Ikzf4* is co-expressed with *Ikzf1* during early stages of retinal development, but not at late stages. The absence of *Ikzf1* at late stages of development may redirect *Ikzf4* from cone genes to glial genes, although such activity would have to be indirect since *Ikzf1* and *Ikzf4* have divergent genome occupancy. The current model of gliogenesis in the retina proposes that *Nfia/b/x* confer late-stage temporal identity to RPCs to generate Müller glia and bipolar cells (Clark et al., 2019; Lyu et al., 2021). In addition to *Nfia/b/x*, *Lhx2* interacts with *Rnf12* in late RPCs to promote gliogenesis by activating the expression of *Sox8/9* and Notch target genes in postmitotic precursors destined to become Müller glia (de Melo et al., 2018; de Melo et al., 2016; Jadhav et al., 2006; Muto et al., 2009; Nelson et al., 2011; Poche et al., 2008; Zhu et al., 2013; Zibetti et al., 2019). *Lhx2* also dynamically alters its DNA binding profile at early and late

stages of retinal development to switch from promoting neurogenesis to gliogenesis (Zibetti et al., 2019), similar to what we observe here with *Ikzf4*. So how does *Ikzf4* fit in the above proposed model of gliogenesis? As *Lhx2* and *Nfia/b/x* cKOs show no significant change in *Ikzf4* transcript levels (Clark et al., 2019; de Melo et al., 2016), and our data show that *Ikzf4* binds to and induces expression of *Lhx2* and *Nfi*, we propose that *Ikzf4* may be upstream of these factors in the gliogenic gene regulatory network. Given the weak expression levels of *Ikzf4* and the low sensitivity of the RNA-seq analysis, however, it is possible that previous studies failed to detect changes in *Ikzf4* expression in the *Lhx2* and *Nfi* cKOs. In any case, our data suggests a model wherein *Ikzf4* favours the emergence of *Sox8/9*<sup>+ve</sup> precursors with sustained Notch signaling, as observed with the increase in *Hes1*<sup>+ve</sup> cells after overexpression of *Ikzf4* in RPCs, which then go on to become Müller glia.

We report that *Ikzf4* binds to regions close to many Notch signaling gene bodies, including multiple sites at the promoter of *Hes1*. As the *Hes1* promoter is active in RPCs and differentiated Müller glia (Matsuda and Cepko, 2007), this suggests that *Ikzf4* might be involved in maintaining *Hes1* expression in mature glia, although this remains to be tested directly. Using CUT&RUN sequencing, we observe a change in genomic binding profiles of *Ikzf4* from early to late stages of retinal development, such as binding to some Notch signaling genes that are exclusively observed at P0, for example *Notch1* and *Rbpj* (Fig. 5A). This suggests that *Ikzf4* regulation of Notch signaling may be more prominent during late stages of retinogenesis, but this remains to be tested. Interestingly, it was recently reported that *Hes1* deletion in early RPCs leads to a reduction in cone numbers and impaired Müller glia morphology (Bosze et al., 2020), two cell fates regulated by *Ikzf4*, supporting the idea that *Hes1* is a key target of *Ikzf4*, both during early and late retinogenesis.

## **Broader role of Ikzf4 in cell fate specification**

Previous studies have elucidated the role of Ikzf4 in the immune system. Most notably, Ikzf4 function in T-cell differentiation varies considerably depending on CD4<sup>+</sup> T-cell subtype, highlighting the dynamic role of Ikzf4 function based on the cellular context (Liu et al., 2014; Pan et al., 2009; Powell et al., 2019; Read et al., 2017; Rieder et al., 2015; Sekiya et al., 2015; Sharma et al., 2013), similar to what we report here. Interestingly, widespread expression of Ikzf4 has been reported in different organs, including the CNS (Perdomo et al., 2000). One study has detailed the role of Ikzf4 in regulating expression of PSD-95 in adult cochlear afferent neurons (Bao et al., 2004), but the function of Ikzf4 in the developing CNS remains largely elusive. The findings reported here suggest that Ikzf4 may have widespread regulatory functions in the CNS to control cell fate specification. Future studies on conditional knockouts of Ikzf4 alone or in combination with other Ikzf genes will be interesting to address this question.

## MATERIALS AND METHODS

### Animals

All experiments were done in accordance with the Canadian Council on Animal guidelines. *Ikzf1* (Wang et al., 1996) and *Ikzf4* (International Mouse Phenotyping Consortium and RIKEN Bioresource [RRID: IMSR\\_RBRC06808](#)) knockout mice were raised in the C57BL/6J background (*Mus musculus*). All other mouse experiments were performed on WT CD1 mice (*Mus musculus*, Charles River Laboratories).

### Retroviral constructs preparation and retinal explant culture

Retroviruses were designed, produced and concentrated as previously described (Cayouette et al., 2003). Retinal explants were cultured as previously outlined (Cayouette et al., 2001). Retroviral infections of retinal explants and analyses of the retroviral clones were done as previously stated (Javed et al., 2020). Eyes were harvested from the mice 14 days or more after electroporation as required for the experiment and processed for immunostaining.

### Plasmid and mutation cloning

*Ikzf1* and *Ikzf4* cDNA were cloned into a pCIG2-IRES-GFP and pCLE-venus vector using restriction sites previously outlined (Gaiano et al., 2000; Hand et al., 2005). pHes1-dsRed vector was mutated with Infusion HD Cloning Plus kit from Takara using primers listed in Table S1 (Matsuda and Cepko, 2007).

### *In vivo* electroporation

P0 or P1 eyes were injected with DNA plasmid at 3ug/ul concentration containing 0.5% fast green and electroporated as previously described (de Melo and Blackshaw, 2011).

## RNA isolation and Quantitative PCR

RNA extraction and qPCR quantitation were performed as previously described (Javed et al., 2020). Primers used are listed in Table S1 (Batsché et al., 2005; Ouimette et al., 2010).

## RNA-seq preparation

P0 CD1 retinas were dissociated using Accutase and transfected using the Amaxa Neural Stem Cell Kit according to the manufacturer's protocol. Cells were seeded into 6-well plates coated with PLL/ Laminin, and cultured as previously described (Gomes et al., 2011). After 9 hr, cells were harvested and dissociated with Accutase followed by FAC-sorting for GFP. Control GFP condition contained  $4 \times 10^5$  cells per biological replicate (n=4) and *Ikzf1* condition contained  $3 \times 10^5$  cells per biological replicate (n=4). Cells were sorted directly into lysis buffer and purified using the RNeasy micro kit from Qiagen. Samples quantity (RNA Integrity Number = RIN) and quality were assessed using the Agilent RNA 6000 Pico Kit (Agilent #5067-1513) on the Bioanalyzer 2100. rRNA was depleted using Ribo-Zero™ Magnetic Gold Kit for rRNA depletion (Human/Mouse/Rat) (Epicentre for Illumina #MRZG12324) according to manufacturer's guidelines. Library preparations were done using SMARTer® Stranded RNA-Seq Kit (Clontech Laboratories, Inc. #634836 or #634837) according to manufacturer's guidelines. Libraries were diluted and pooled equimolar and then sequenced in pair end 50 cycles (PE50) on a v4 flowcell (Illumina - HiSeq PE Cluster Kit v4 cBot - PE-401-4001) of the Illumina HiSeq 2500 System.

## Tissue collection and immunofluorescence

Age of mouse embryos was calculated from pregnant females with the day of vaginal plug considered as day 0 (E0) and collected at E11, E14, E15, E16, E17, P0, P2, and P7 for spatiotemporal analyses. For *Ikzf1* and *Ikzf4* immunostaining, the retinas were dissected and



fixed for 2mins in 4%PFA/PBS followed by immersion in 20% Sucrose/PBS for 1hour. Retinas were then embedded in OCT, frozen in liquid nitrogen, sectioned at 25 $\mu$ m using a cryostat and immunostained on the same day. For all other antibodies, the decapitated heads from embryos or eyes from postnatal pups were fixed for 15mins in 4%PFA/PBS and immersed in 20% Sucrose/PBS for 2 hours.

Immunofluorescence was performed as previously described (Javed et al., 2020). List of primary antibodies can be found in Table S2 including DHSB antibodies (Venkataraman et al., 2018).

#### EdU labelling assay

30 $\mu$ M of EdU was added to the culture medium for 2hours before collection and fixation. Click-iT™ EdU Alexa Fluor™ 647 was used to label cells that incorporated EdU.

#### Statistical and Quantitative analyses

Statistical tests were performed for each experiment in this study as indicated in the Figure legends. All quantifications in the bar graphs of this study are represented as mean  $\pm$  standard error of the mean (s.e.m.) whereas n number and individual values on the graphs represent biological replicates. Statistics for the retroviral clonal analyses were performed as previously outlined (Pounds and Dyer, 2008). Retinal explants containing disorganised layers and poor immunostainings were discarded and analysis was limited to the organised regions of the retinal explants. All experiments were repeated at least three times.

Ikzf4 knockouts were analysed as follows: Two sections of P10 central retinas oriented temporo-nasally were examined with quantifications of 200 $\mu$ m (Pax6), 400 $\mu$ m (Otx2, Sox2, and

Lhx2 staining in the INL, Rxrg in the ONL) and 800µm (Brn3a and Lim-1) length of the imaged section. The investigator was blinded to the genotype of animals. An ImageJ analysis macro was written to count cell automatically in a section. Analyse particles was used after defining a region of interest and setting threshold for each antibody to auto-count cell numbers of Pax6<sup>+ve</sup>, Otx2<sup>+ve</sup>, Sox2<sup>+ve</sup>, Lhx2<sup>+ve</sup> and Brn3a<sup>+ve</sup> cells whereas Rxrg<sup>+ve</sup> and Lim-1<sup>+ve</sup> were manually counted. Ikzf1/4 double knockouts were analysed as follows: Three sections of E15 central retinas in embryonic heads oriented dorso-ventrally were analysed with quantification of 200µm for Rxrg<sup>+ve</sup> cells and 400µm for Brn3a<sup>+ve</sup> cells. Rxrg<sup>+ve</sup> cell were manually counted due to background signal, whereas Brn3a<sup>+ve</sup> cells were counted using the ImageJ analysis macro as described above.

All cell quantifications were performed by blinding the investigators to the genotype of the animals.

### CUT&RUN assays

CUT&RUN was performed as previously described (Skene et al., 2018), with a few added modifications. For Ikzf1 CUT&RUN, CAG-Ikzf1 electroporated P0 retinal explants were cultured and 50,000 GFP+ve cells were sorted directly into the buffer with Concanavalin-A beads. For Ikzf4 CUT&RUN, E14 and P0 retinas were dissected, and 1,500,000 cells were used for each stage. The entire procedure was done in 200µl PCR tubes. 0.01% digitonin concentration was used and pAG-MNase digestion was performed for 30min on ice.

Libraries were prepared with the KAPA DNA HyperPrep Kit (Roche 07962363001 - KK8504). This protocol includes an End-Repair/A-tailing step and an adapter ligation step followed by a PCR amplification (enrichment) of ligated fragments. The adapters used for ligation were IDT for Illumina TruSeq UD Indexes (Illumina - 20022371). The final enriched

product (library, after PCR) was purified using KAPA purification beads (Roche 07983298001 - KK8002) and a dual-SPRI size selection was performed (with KAPA beads) to select fragments between 180-500 bp. Libraries were then quantified using a Nanodrop microvolume spectrophotometer (ng/μl) and quality was assessed using the Agilent High Sensitivity DNA Kit (Agilent -5067-4626) on a Bioanalyzer 2100. The libraries were then quantified by q-PCR to obtain their nanomolar (nM) concentration. Libraries were diluted, pooled equimolar and sequenced in pair end 50 cycles (PE50) on a S1 flowcell (Illumina - 20012863) of the Illumina NovaSeq 6000 System.

### Bioinformatics analyses

scRNA-seq analyses of previously published datasets was performed as follows. Fastq raw reads were aligned and counted to generate matrices for each individual stage from Mouse retina atlas (GEO: GSE118614) (Clark et al., 2019) and Human fetal retina atlas (GEO: GSE116106, GSE122970, GSE138002) (Lu et al., 2020) using Cellranger 4.0 (10x Genomics). Velocity (La Manno et al., 2018) with run10x function was used on cellranger output folders to generate .loom files for each individual stages. Seurat (Butler et al., 2018) was used to analyse the mouse and human retina. loom files and subset RPC clusters for *Ikzf4*/*IKZF4* expression analyses using markers previously described (Clark et al., 2019; Lu et al., 2020). Scanpy (Wolf et al., 2018) was used to analyse the same .loom files and generate *Ikzf4*/*IKZF4* expression UMAPs along with cell type markers (Fig. S2).

RNA-seq fastq raw reads were analysed using the salmon quantification package (Patro et al., 2017). Differentially gene expression analyses between CAG-GFP and CAG-*Ikzf1* was performed using DESeq2 on Salmon quant output files (Love et al., 2014). Microsoft Excel was used to compare differentially expressed gene lists with other datasets manually.

CUT&RUN analyses were performed by aligning the raw fastq reads with the mouse mm9 genome using default parameters of bowtie2 on Galaxy platform (Afgan et al., 2016; Langmead and Salzberg, 2012). Bam files generated for Ikzf4 and IgG CUT&RUN at each stage were used to call peaks using 0.5 FDR parameter on MACS2 (Feng et al., 2012). Bedtools was used to find overlapping peaks between the two stage (Quinlan and Hall, 2010). Bigwig files were generated using deeptools2 (Ramirez et al., 2016). Integrative Genomics Viewer (IGV) was used to visualize bigwig files.

TOBIAS footprinting analysis was performed by first intersecting ATAC-seq peaks at E14 and P0 from previously published datasets (Aldiri et al., 2017), with Ikzf4 E14 and P0 regions using bedtools (Bentsen et al., 2020; Quinlan and Hall, 2010). TOBIAS ATACCorrect and ScoreBigwig was performed on ATAC-seq E14 and P0 .bam files separately to generate corrected ATAC-seq bigwig files. The two E14 and P0 regions were merged using bedtools and BINDetect was used to estimate differentially bound motifs based on scores, sequence and motifs. JASPAR non-redundant vertebrate motifs package was used for motif annotation on the mm9 genome (Fornes et al., 2020).

Volcano plot was generated using the EnhancedVolcano plot github package (<https://github.com/kevinblighe/EnhancedVolcano>), whereas Upset plots were generated using Upsetplot shiny web tool (Conway et al., 2017).

Information on each software version is listed in Table S2.

#### Data availability

E14 IgG CUT&RUN raw reads are available on previously published GEO accession number: GSE156756 (Brodie-Kommit et al., 2021). Processed RNA-seq, MACS2 peaks and bigwig files are available on GEO accession number: GSE189590.

## **COMPETING INTEREST STATEMENT**

The authors declare no conflict of interest.

## **ACKNOWLEDGEMENTS**

We thank Christine Jolicoeur, Jessica Barthe, Androne Constantin, Odile Neyret-Djossou, Éric Massicotte and Julie Lord for animal and technical assistance. We thank Seth Blackshaw for critical comments on the manuscript. We thank Aurelie Huang-Sung and Dr. Nicole Francis for providing the pAG-MNase for the CUT&RUN experiments. We thank Benoit Boulan for writing the ImageJ macro. We also thank all members of the Cayouette lab for their comments and support. This project was funded by grants from the Canadian Institutes of Health Research (FDN-159936) and Fighting Blindness Canada to M.C. A.J. was supported by a Ph.D. scholarship from the Fonds de recherche du Québec – Santé. M.C. is an Emeritus Scholar from Fonds de recherche du Québec – Santé and holds the Gaëtane and Rolland Pillenière Chair in Retinal Biology from the Montreal Clinical Research Institute Foundation.

## **AUTHOR CONTRIBUTIONS**

Conceptualization, A.J. and M.C.; Investigation, A.J., P.M., A.C.; Writing – Original Draft, A.J.; Writing – Review & Editing, P.M., M.C., and M.C.; Resources, M.C.; Supervision, M.C.; Funding Acquisition, M.C.

## REFERENCES

- Afgan, E., Baker, D., van den Beek, M., Blankenberg, D., Bouvier, D., Cech, M., Chilton, J., Clements, D., Coraor, N., Eberhard, C., *et al.* (2016). The Galaxy platform for accessible, reproducible and collaborative biomedical analyses: 2016 update. *Nucleic Acids Res* *44*, W3-W10.
- Aldiri, I., Xu, B., Wang, L., Chen, X., Hiler, D., Griffiths, L., Valentine, M., Shirinifard, A., Thiagarajan, S., Sablauer, A., *et al.* (2017). The Dynamic Epigenetic Landscape of the Retina During Development, Reprogramming, and Tumorigenesis. *Neuron* *94*, 550-568 e510.
- Bao, J., Lin, H., Ouyang, Y., Lei, D., Osman, A., Kim, T.W., Mei, L., Dai, P., Ohlemiller, K.K., and Ambron, R.T. (2004). Activity-dependent transcription regulation of PSD-95 by neuregulin-1 and Eos. *Nat Neurosci* *7*, 1250-1258.
- Batsché, E., Moschopoulos, P., Desroches, J., Bilodeau, S., and Drouin, J. (2005). Retinoblastoma and the related pocket protein p107 act as coactivators of NeuroD1 to enhance gene transcription. *J Biol Chem* *280*, 16088-16095.
- Bentsen, M., Goymann, P., Schultheis, H., Klee, K., Petrova, A., Wiegandt, R., Fust, A., Preussner, J., Kuenne, C., Braun, T., *et al.* (2020). ATAC-seq footprinting unravels kinetics of transcription factor binding during zygotic genome activation. *Nature Communications* *11*, 4267.
- Blackshaw, S., Harpavat, S., Trimarchi, J., Cai, L., Huang, H., Kuo, W.P., Weber, G., Lee, K., Fraioli, R.E., Cho, S.H., *et al.* (2004). Genomic analysis of mouse retinal development. *PLoS Biol* *2*, E247.
- Bosze, B., Moon, M.S., Kageyama, R., and Brown, N.L. (2020). Simultaneous Requirements for Hes1 in Retinal Neurogenesis and Optic Cup-Stalk Boundary Maintenance. *J Neurosci* *40*, 1501-1513.
- Brodie-Kommit, J., Clark, B.S., Shi, Q., Shiao, F., Kim, D.W., Langel, J., Sheely, C., Ruzycski, P.A., Fries, M., Javed, A., *et al.* (2021). Atoh7-independent specification of retinal ganglion cell identity. *Sci Adv* *7*.
- Brody, T., and Odenwald, W.F. (2000). Programmed transformations in neuroblast gene expression during Drosophila CNS lineage development. *Dev Biol* *226*, 34-44.
- Butler, A., Hoffman, P., Smibert, P., Papalexi, E., and Satija, R. (2018). Integrating single-cell transcriptomic data across different conditions, technologies, and species. *Nat Biotechnol* *36*, 411-420.
- Cao, R., Wang, L., Wang, H., Xia, L., Erdjument-Bromage, H., Tempst, P., Jones, R.S., and Zhang, Y. (2002). Role of histone H3 lysine 27 methylation in Polycomb-group silencing. *Science* *298*, 1039-1043.
- Carter-Dawson, L.D., and LaVail, M.M. (1979a). Rods and cones in the mouse retina. I. Structural analysis using light and electron microscopy. *J Comp Neurol* *188*, 245-262.
- Carter-Dawson, L.D., and LaVail, M.M. (1979b). Rods and cones in the mouse retina. II. Autoradiographic analysis of cell generation using tritiated thymidine. *J Comp Neurol* *188*, 263-272.
- Cayouette, M., Barres, B.A., and Raff, M. (2003). Importance of intrinsic mechanisms in cell fate decisions in the developing rat retina. *Neuron* *40*, 897-904.
- Cayouette, M., Whitmore, A.V., Jeffery, G., and Raff, M. (2001). Asymmetric segregation of Numb in retinal development and the influence of the pigmented epithelium. *J Neurosci* *21*, 5643-5651.

- Clark, B.S., Stein-O'Brien, G.L., Shiau, F., Cannon, G.H., Davis-Marcisak, E., Sherman, T., Santiago, C.P., Hoang, T.V., Rajaii, F., James-Esposito, R.E., *et al.* (2019). Single-Cell RNA-Seq Analysis of Retinal Development Identifies NFI Factors as Regulating Mitotic Exit and Late-Born Cell Specification. *Neuron* *102*, 1111-1126 e1115.
- Cleary, M.D., and Doe, C.Q. (2006). Regulation of neuroblast competence: multiple temporal identity factors specify distinct neuronal fates within a single early competence window. *Genes Dev* *20*, 429-434.
- Conway, J.R., Lex, A., and Gehlenborg, N. (2017). UpSetR: an R package for the visualization of intersecting sets and their properties. *Bioinformatics* *33*, 2938-2940.
- Creyghton, M.P., Cheng, A.W., Welstead, G.G., Kooistra, T., Carey, B.W., Steine, E.J., Hanna, J., Lodato, M.A., Frampton, G.M., Sharp, P.A., *et al.* (2010). Histone H3K27ac separates active from poised enhancers and predicts developmental state. *107*, 21931-21936.
- Davis, N., Mor, E., and Ashery-Padan, R. (2011). Roles for Dicer1 in the patterning and differentiation of the optic cup neuroepithelium. *Development* *138*, 127-138.
- de Melo, J., and Blackshaw, S. (2011). In vivo electroporation of developing mouse retina. *J Vis Exp*.
- de Melo, J., Clark, B.S., Venkataraman, A., Shiau, F., Zibetti, C., and Blackshaw, S. (2018). Ldb1- and Rnf12-dependent regulation of Lhx2 controls the relative balance between neurogenesis and gliogenesis in the retina. *Development* *145*.
- de Melo, J., Peng, G.H., Chen, S., and Blackshaw, S. (2011). The Spalt family transcription factor Sall3 regulates the development of cone photoreceptors and retinal horizontal interneurons. *Development* *138*, 2325-2336.
- de Melo, J., Zibetti, C., Clark, B.S., Hwang, W., Miranda-Angulo, A.L., Qian, J., and Blackshaw, S. (2016). Lhx2 Is an Essential Factor for Retinal Gliogenesis and Notch Signaling. *J Neurosci* *36*, 2391-2405.
- Decembrini, S., Bressan, D., Vignali, R., Pitto, L., Mariotti, S., Rainaldi, G., Wang, X., Evangelista, M., Barsacchi, G., and Cremisi, F. (2009). MicroRNAs couple cell fate and developmental timing in retina. *Proc Natl Acad Sci U S A* *106*, 21179-21184.
- Dupacova, N., Antosova, B., Paces, J., and Kozmik, Z. (2021). Meis homeobox genes control progenitor competence in the retina. *118*, e2013136118.
- Elliott, J., Jolicoeur, C., Ramamurthy, V., and Cayouette, M. (2008). Ikaros confers early temporal competence to mouse retinal progenitor cells. *Neuron* *60*, 26-39.
- Erclik, T., Li, X., Courgeon, M., Bertet, C., Chen, Z., Baumert, R., Ng, J., Koo, C., Arain, U., Behnia, R., *et al.* (2017). Integration of temporal and spatial patterning generates neural diversity. *Nature* *541*, 365-370.
- Feng, J., Liu, T., Qin, B., Zhang, Y., and Liu, X.S. (2012). Identifying ChIP-seq enrichment using MACS. *Nat Protoc* *7*, 1728-1740.
- Feng, L., Xie, X., Joshi, P.S., Yang, Z., Shibasaki, K., Chow, R.L., and Gan, L. (2006). Requirement for Bhlhb5 in the specification of amacrine and cone bipolar subtypes in mouse retina. *Development* *133*, 4815-4825.
- Fornes, O., Castro-Mondragon, J.A., Khan, A., van der Lee, R., Zhang, X., Richmond, P.A., Modi, B.P., Correard, S., Gheorghe, M., Baranašić, D., *et al.* (2020). JASPAR 2020: update of the open-access database of transcription factor binding profiles. *Nucleic Acids Res* *48*, D87-d92.

- Furukawa, T., Mukherjee, S., Bao, Z.Z., Morrow, E.M., and Cepko, C.L. (2000). *rax*, *Hes1*, and *notch1* promote the formation of Muller glia by postnatal retinal progenitor cells. *Neuron* *26*, 383-394.
- Gaiano, N., Nye, J.S., and Fishell, G. (2000). Radial glial identity is promoted by Notch1 signaling in the murine forebrain. *Neuron* *26*, 395-404.
- Georgi, S.A., and Reh, T.A. (2010). *Dicer* is required for the transition from early to late progenitor state in the developing mouse retina. *J Neurosci* *30*, 4048-4061.
- Gomes, F.L., Zhang, G., Carbonell, F., Correa, J.A., Harris, W.A., Simons, B.D., and Cayouette, M. (2011). Reconstruction of rat retinal progenitor cell lineages in vitro reveals a surprising degree of stochasticity in cell fate decisions. *Development* *138*, 227-235.
- Gordon, P.J., Yun, S., Clark, A.M., Monuki, E.S., Murtaugh, L.C., and Levine, E.M. (2013). *Lhx2* balances progenitor maintenance with neurogenic output and promotes competence state progression in the developing retina. *J Neurosci* *33*, 12197-12207.
- Grosskortenhaus, R., Pearson, B.J., Marusich, A., and Doe, C.Q. (2005). Regulation of temporal identity transitions in *Drosophila* neuroblasts. *Dev Cell* *8*, 193-202.
- Grosskortenhaus, R., Robinson, K.J., and Doe, C.Q. (2006). *Pdm* and *Castor* specify late-born motor neuron identity in the NB7-1 lineage. *Genes Dev* *20*, 2618-2627.
- Hand, R., Bortone, D., Mattar, P., Nguyen, L., Heng, J.I., Guerrier, S., Boutt, E., Peters, E., Barnes, A.P., Parras, C., *et al.* (2005). Phosphorylation of Neurogenin2 specifies the migration properties and the dendritic morphology of pyramidal neurons in the neocortex. *Neuron* *48*, 45-62.
- Heinz, S., Benner, C., Spann, N., Bertolino, E., Lin, Y.C., Laslo, P., Cheng, J.X., Murre, C., Singh, H., and Glass, C.K. (2010). Simple combinations of lineage-determining transcription factors prime cis-regulatory elements required for macrophage and B cell identities. *Mol Cell* *38*, 576-589.
- Iida, A., Shinoue, T., Baba, Y., Mano, H., and Watanabe, S. (2011). *Dicer* plays essential roles for retinal development by regulation of survival and differentiation. *Invest Ophthalmol Vis Sci* *52*, 3008-3017.
- Imayoshi, I., Isomura, A., Harima, Y., Kawaguchi, K., Kori, H., Miyachi, H., Fujiwara, T., Ishidate, F., and Kageyama, R. (2013). Oscillatory control of factors determining multipotency and fate in mouse neural progenitors. *Science* *342*, 1203-1208.
- Isshiki, T., Pearson, B., Holbrook, S., and Doe, C.Q. (2001). *Drosophila* neuroblasts sequentially express transcription factors which specify the temporal identity of their neuronal progeny. *Cell* *106*, 511-521.
- Jadhav, A.P., Cho, S.H., and Cepko, C.L. (2006). Notch activity permits retinal cells to progress through multiple progenitor states and acquire a stem cell property. *Proc Natl Acad Sci U S A* *103*, 18998-19003.
- Javed, A., Mattar, P., Lu, S., Kruczek, K., Kloc, M., Gonzalez-Cordero, A., Bremner, R., Ali, R.R., and Cayouette, M. (2020). *Pou2f1* and *Pou2f2* cooperate to control the timing of cone photoreceptor production in the developing mouse retina. *Development* *147*.
- Jiang, H., and Xiang, M. (2009). Subtype specification of GABAergic amacrine cells by the orphan nuclear receptor *Nr4a2/Nurr1*. *J Neurosci* *29*, 10449-10459.
- Jin, K., Jiang, H., Xiao, D., Zou, M., Zhu, J., and Xiang, M. (2015). *Tfap2a* and *2b* act downstream of *Ptf1a* to promote amacrine cell differentiation during retinogenesis. *Mol Brain* *8*, 28.



- Kallman, A., Capowski, E.E., Wang, J., Kaushik, A.M., Jansen, A.D., Edwards, K.L., Chen, L., Berlinicke, C.A., Joseph Phillips, M., Pierce, E.A., *et al.* (2020). Investigating cone photoreceptor development using patient-derived NRL null retinal organoids. *Commun Biol* 3, 82.
- Kambadur, R., Koizumi, K., Stivers, C., Nagle, J., Poole, S.J., and Odenwald, W.F. (1998). Regulation of POU genes by castor and hunchback establishes layered compartments in the *Drosophila* CNS. *Genes Dev* 12, 246-260.
- La Manno, G., Soldatov, R., Zeisel, A., Braun, E., Hochgerner, H., Petukhov, V., Lidschreiber, K., Kastrioti, M.E., Lonnerberg, P., Furlan, A., *et al.* (2018). RNA velocity of single cells. *Nature* 560, 494-498.
- La Torre, A., Georgi, S., and Reh, T.A. (2013). Conserved microRNA pathway regulates developmental timing of retinal neurogenesis. *110*, E2362-E2370.
- Langmead, B., and Salzberg, S.L. (2012). Fast gapped-read alignment with Bowtie 2. *Nat Methods* 9, 357-359.
- Li, S., Mo, Z., Yang, X., Price, S.M., Shen, M.M., and Xiang, M. (2004). Foxn4 Controls the Genesis of Amacrine and Horizontal Cells by Retinal Progenitors. *Neuron* 43, 795-807.
- Li, X., Erclik, T., Bertet, C., Chen, Z., Voutev, R., Venkatesh, S., Morante, J., Celik, A., and Desplan, C. (2013). Temporal patterning of *Drosophila* medulla neuroblasts controls neural fates. *Nature* 498, 456-462.
- Lin, Y.-p., Ouchi, Y., Satoh, S., and Watanabe, S. (2009). Sox2 plays a role in the induction of amacrine and Müller glial cells in mouse retinal progenitor cells. *Investigative ophthalmology & visual science* 50, 68-74.
- Liu, S., Liu, X., Li, S., Huang, X., Qian, H., Jin, K., and Xiang, M. (2020). Foxn4 is a temporal identity factor conferring mid/late-early retinal competence and involved in retinal synaptogenesis. *Proc Natl Acad Sci U S A* 117, 5016-5027.
- Liu, S.Q., Jiang, S., Li, C., Zhang, B., and Li, Q.J. (2014). miR-17-92 cluster targets phosphatase and tensin homology and Ikaros Family Zinc Finger 4 to promote TH17-mediated inflammation. *J Biol Chem* 289, 12446-12456.
- Livne-bar, I., Pacal, M., Cheung, M.C., Hankin, M., Trogadis, J., Chen, D., Dorval, K.M., and Bremner, R. (2006). Chx10 is required to block photoreceptor differentiation but is dispensable for progenitor proliferation in the postnatal retina. *103*, 4988-4993.
- Love, M.I., Huber, W., and Anders, S. (2014). Moderated estimation of fold change and dispersion for RNA-seq data with DESeq2. *Genome Biology* 15, 550.
- Lu, Y., Shiau, F., Yi, W., Lu, S., Wu, Q., Pearson, J.D., Kallman, A., Zhong, S., Hoang, T., Zuo, Z., *et al.* (2020). Single-Cell Analysis of Human Retina Identifies Evolutionarily Conserved and Species-Specific Mechanisms Controlling Development. *Dev Cell* 53, 473-491 e479.
- Lyu, P., Hoang, T., Santiago, C.P., Thomas, E.D., Timms, A.E., Appel, H., Gimmen, M., Le, N., Jiang, L., Kim, D.W., *et al.* (2021). Gene regulatory networks controlling temporal patterning, neurogenesis, and cell fate specification in the mammalian retina. 2021.2007.2031.454200.
- Marquardt, T., Ashery-Padan, R., Andrejewski, N., Scardigli, R., Guillemot, F., and Gruss, P. (2001). Pax6 is required for the multipotent state of retinal progenitor cells. *Cell* 105, 43-55.
- Matsuda, T., and Cepko, C.L. (2007). Controlled expression of transgenes introduced by in vivo electroporation. *Proc Natl Acad Sci U S A* 104, 1027-1032.
- Mattar, P., Ericson, J., Blackshaw, S., and Cayouette, M. (2015). A conserved regulatory logic controls temporal identity in mouse neural progenitors. *Neuron* 85, 497-504.

- McLean, C.Y., Bristor, D., Hiller, M., Clarke, S.L., Schaar, B.T., Lowe, C.B., Wenger, A.M., and Bejerano, G. (2010). GREAT improves functional interpretation of cis-regulatory regions. *Nat Biotechnol* 28, 495-501.
- Molnár, A., and Georgopoulos, K. (1994). The Ikaros gene encodes a family of functionally diverse zinc finger DNA-binding proteins. *Mol Cell Biol* 14, 8292-8303.
- Mori, M., Ghyselinck, N.B., Chambon, P., and Mark, M. (2001). Systematic immunolocalization of retinoid receptors in developing and adult mouse eyes. *Invest Ophthalmol Vis Sci* 42, 1312-1318.
- Muto, A., Iida, A., Satoh, S., and Watanabe, S. (2009). The group E Sox genes Sox8 and Sox9 are regulated by Notch signaling and are required for Muller glial cell development in mouse retina. *Exp Eye Res* 89, 549-558.
- Nelson, B.R., Ueki, Y., Reardon, S., Karl, M.O., Georgi, S., Hartman, B.H., Lamba, D.A., and Reh, T.A. (2011). Genome-wide analysis of Muller glial differentiation reveals a requirement for Notch signaling in postmitotic cells to maintain the glial fate. *PLoS One* 6, e22817.
- Novotny, T., Eiselt, R., and Urban, J. (2002). Hunchback is required for the specification of the early sublineage of neuroblast 7-3 in the Drosophila central nervous system. *Development* 129, 1027-1036.
- Orford, K., Kharchenko, P., Lai, W., Dao, M.C., Worhunsky, D.J., Ferro, A., Janzen, V., Park, P.J., and Scadden, D.T. (2008). Differential H3K4 Methylation Identifies Developmentally Poised Hematopoietic Genes. *Developmental Cell* 14, 798-809.
- Ouimette, J.F., Jolin, M.L., L'Honore, A., Gifuni, A., and Drouin, J. (2010). Divergent transcriptional activities determine limb identity. *Nat Commun* 1, 35.
- Pan, F., Yu, H., Dang, E.V., Barbi, J., Pan, X., Grosso, J.F., Jinasena, D., Sharma, S.M., McCadden, E.M., Getnet, D., *et al.* (2009). Eos mediates Foxp3-dependent gene silencing in CD4+ regulatory T cells. *Science* 325, 1142-1146.
- Patro, R., Duggal, G., Love, M.I., Irizarry, R.A., and Kingsford, C. (2017). Salmon provides fast and bias-aware quantification of transcript expression. *Nat Methods* 14, 417-419.
- Pearson, B.J., and Doe, C.Q. (2003). Regulation of neuroblast competence in Drosophila. *Nature* 425, 624-628.
- Perdomo, J., Holmes, M., Chong, B., and Crossley, M. (2000). Eos and pegasus, two members of the Ikaros family of proteins with distinct DNA binding activities. *J Biol Chem* 275, 38347-38354.
- Poche, R.A., Furuta, Y., Chaboissier, M.C., Schedl, A., and Behringer, R.R. (2008). Sox9 is expressed in mouse multipotent retinal progenitor cells and functions in Muller glial cell development. *J Comp Neurol* 510, 237-250.
- Pomaznoy, M., Ha, B., and Peters, B. (2018). GOnet: a tool for interactive Gene Ontology analysis. *BMC Bioinformatics* 19, 470.
- Pounds, S., and Dyer, M.A. (2008). Statistical analysis of data from retroviral clonal experiments in the developing retina. *Brain Res* 1192, 178-185.
- Powell, M.D., Read, K.A., Sreekumar, B.K., and Oestreich, K.J. (2019). Ikaros Zinc Finger Transcription Factors: Regulators of Cytokine Signaling Pathways and CD4(+) T Helper Cell Differentiation. *Front Immunol* 10, 1299.
- Quinlan, A.R., and Hall, I.M. (2010). BEDTools: a flexible suite of utilities for comparing genomic features. *Bioinformatics* 26, 841-842.

- Ramirez, F., Ryan, D.P., Gruning, B., Bhardwaj, V., Kilpert, F., Richter, A.S., Heyne, S., Dundar, F., and Manke, T. (2016). deepTools2: a next generation web server for deep-sequencing data analysis. *Nucleic Acids Res* 44, W160-165.
- Rapaport, D.H., Wong, L.L., Wood, E.D., Yasumura, D., and LaVail, M.M. (2004). Timing and topography of cell genesis in the rat retina. *J Comp Neurol* 474, 304-324.
- Read, K.A., Powell, M.D., Baker, C.E., Sreekumar, B.K., Ringel-Scaia, V.M., Bachus, H., Martin, R.E., Cooley, I.D., Allen, I.C., Ballesteros-Tato, A., *et al.* (2017). Integrated STAT3 and Ikaros Zinc Finger Transcription Factor Activities Regulate Bcl-6 Expression in CD4(+) Th Cells. *J Immunol* 199, 2377-2387.
- Rice, D.S., and Curran, T. (2000). Disabled-1 is expressed in type AII amacrine cells in the mouse retina. *J Comp Neurol* 424, 327-338.
- Rieder, S.A., Metidji, A., Glass, D.D., Thornton, A.M., Ikeda, T., Morgan, B.A., and Shevach, E.M. (2015). Eos Is Redundant for Regulatory T Cell Function but Plays an Important Role in IL-2 and Th17 Production by CD4+ Conventional T Cells. *J Immunol* 195, 553-563.
- Riesenberg, A.N., and Brown, N.L. (2016). Cell autonomous and nonautonomous requirements for *Dell1* during early mouse retinal neurogenesis. *Dev Dyn* 245, 631-640.
- Roesch, K., Jadhav, A.P., Trimarchi, J.M., Stadler, M.B., Roska, B., Sun, B.B., and Cepko, C.L. (2008). The transcriptome of retinal Muller glial cells. *J Comp Neurol* 509, 225-238.
- Sagner, A., and Briscoe, J. (2019). Establishing neuronal diversity in the spinal cord: a time and a place. *Development* 146.
- Satoh, S., Tang, K., Iida, A., Inoue, M., Kodama, T., Tsai, S.Y., Tsai, M.J., Furuta, Y., and Watanabe, S. (2009). The spatial patterning of mouse cone opsin expression is regulated by bone morphogenetic protein signaling through downstream effector COUP-TF nuclear receptors. *J Neurosci* 29, 12401-12411.
- Schwickert, T.A., Tagoh, H., Gültekin, S., Dakic, A., Axelsson, E., Minnich, M., Ebert, A., Werner, B., Roth, M., Cimmino, L., *et al.* (2014). Stage-specific control of early B cell development by the transcription factor Ikaros. *Nat Immunol* 15, 283-293.
- Sekiya, T., Kondo, T., Shichita, T., Morita, R., Ichinose, H., and Yoshimura, A. (2015). Suppression of Th2 and Tfh immune reactions by Nr4a receptors in mature T reg cells. *J Exp Med* 212, 1623-1640.
- Sharma, M.D., Huang, L., Choi, J.H., Lee, E.J., Wilson, J.M., Lemos, H., Pan, F., Blazar, B.R., Pardoll, D.M., Mellor, A.L., *et al.* (2013). An inherently bifunctional subset of Foxp3+ T helper cells is controlled by the transcription factor eos. *Immunity* 38, 998-1012.
- Shimojo, H., Ohtsuka, T., and Kageyama, R. (2008). Oscillations in notch signaling regulate maintenance of neural progenitors. *Neuron* 58, 52-64.
- Skene, P.J., Henikoff, J.G., and Henikoff, S. (2018). Targeted in situ genome-wide profiling with high efficiency for low cell numbers. *Nat Protoc* 13, 1006-1019.
- Surzenko, N., Crowl, T., Bachleda, A., Langer, L., and Pevny, L. (2013). SOX2 maintains the quiescent progenitor cell state of postnatal retinal Muller glia. *Development (Cambridge, England)* 140, 1445-1456.
- Taranova, O.V., Magness, S.T., Fagan, B.M., Wu, Y., Surzenko, N., Hutton, S.R., and Pevny, L.H. (2006). SOX2 is a dose-dependent regulator of retinal neural progenitor competence. *Genes Dev* 20, 1187-1202.
- Turner, D.L., Snyder, E.Y., and Cepko, C.L. (1990). Lineage-independent determination of cell type in the embryonic mouse retina. *Neuron* 4, 833-845.

- Venkataraman, A., Yang, K., Irizarry, J., Mackiewicz, M., Mita, P., Kuang, Z., Xue, L., Ghosh, D., Liu, S., Ramos, P., *et al.* (2018). A toolbox of immunoprecipitation-grade monoclonal antibodies to human transcription factors. *Nat Methods* *15*, 330-338.
- Wang, J.H., Nichogiannopoulou, A., Wu, L., Sun, L., Sharpe, A.H., Bigby, M., and Georgopoulos, K. (1996). Selective defects in the development of the fetal and adult lymphoid system in mice with an Ikaros null mutation. *Immunity* *5*, 537-549.
- Wolf, F.A., Angerer, P., and Theis, F.J. (2018). SCANPY: large-scale single-cell gene expression data analysis. *Genome Biol* *19*, 15.
- Xiang, M. (1998). Requirement for Brn-3b in early differentiation of postmitotic retinal ganglion cell precursors. *Dev Biol* *197*, 155-169.
- Yang, Z., Ding, K., Pan, L., Deng, M., and Gan, L. (2003). Math5 determines the competence state of retinal ganglion cell progenitors. *Developmental Biology* *264*, 240-254.
- Young, R.W. (1985a). Cell differentiation in the retina of the mouse. *Anat Rec* *212*, 199-205.
- Young, R.W. (1985b). Cell proliferation during postnatal development of the retina in the mouse. *Brain Res* *353*, 229-239.
- Yu, G., Wang, L.G., and He, Q.Y. (2015). ChIPseeker: an R/Bioconductor package for ChIP peak annotation, comparison and visualization. *Bioinformatics* *31*, 2382-2383.
- Zhu, M.-Y., Gasperowicz, M., and Chow, R.L. (2013). The expression of NOTCH2, HES1 and SOX9 during mouse retinal development. *Gene Expression Patterns* *13*, 78-83.
- Zibetti, C., Liu, S., Wan, J., Qian, J., and Blackshaw, S. (2019). Epigenomic profiling of retinal progenitors reveals LHX2 is required for developmental regulation of open chromatin. *Commun Biol* *2*, 142.

## FIGURES

Figure 1, Javed et al.

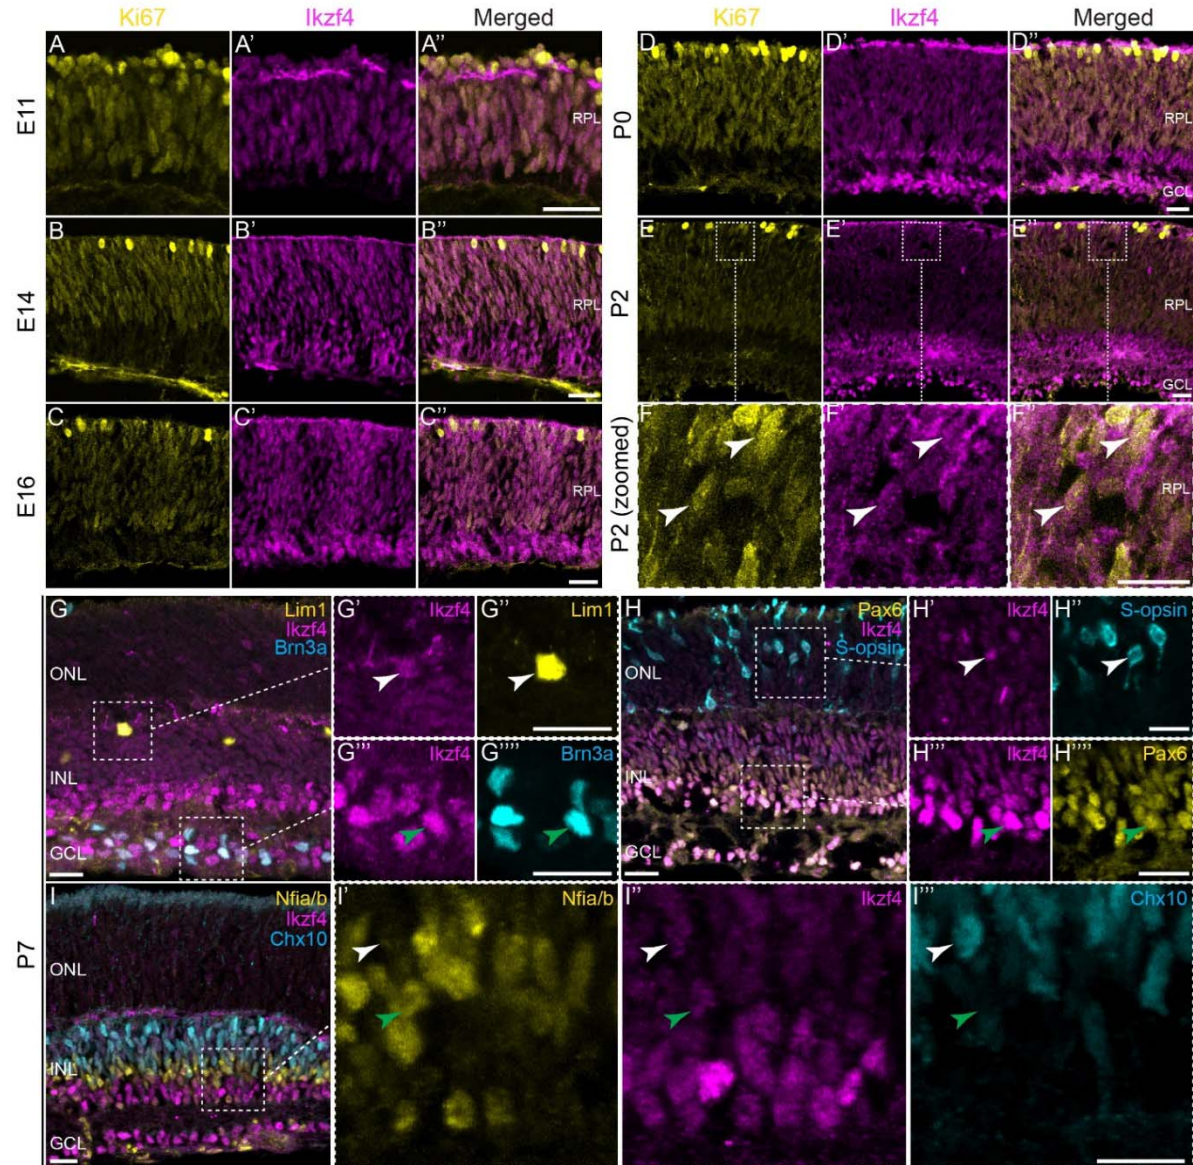

**Figure 1: *Ikzf4* is expressed during early and late retinogenesis.**

(A-E'') Co-immunostaining for Ki67 (yellow) and *Ikzf4* (magenta) at various stages of mouse retinal development. (F-F'') Zoomed-in images of (E-E''), arrows show co-expression of Ki67 (yellow) and *Ikzf4* (magenta) in some cells. (G-I'') Zoomed-out (G-I) and -in (G'-G''', H'-H''', I'-I''') examples of P7 mouse retinas co-immunostained for *Ikzf4* (G', G''', H', H''', I'), Lim1 (G''), Brn3a (G'''), S-opsin (H''), Pax6 (H'''), Nfia/b (I') and Chx10 (I'''). White arrows indicate *Ikzf4*<sup>+</sup>Lim1<sup>+</sup> (G'-G''), *Ikzf4*<sup>+</sup>S-opsin<sup>+</sup> (H'-H'') and Nfia/b<sup>-</sup>*Ikzf4*<sup>+</sup>Chx10<sup>+</sup> (I'-I''). Green arrows indicate *Ikzf4*<sup>+</sup>Brn3a<sup>+</sup> (G''-G'''), Pax6<sup>+</sup>*Ikzf4*<sup>+</sup> (H''-H''') and Nfia/b<sup>+</sup>*Ikzf4*<sup>+</sup>Chx10<sup>-</sup> (I'-I''). Zoomed in regions are highlighted with dashed boxes. RPL: Retinal progenitor layer. ONL: Outer nuclear layer. INL: Inner nuclear layer. GCL: Ganglion cell layer. Scale bars: 20µm (A-E''), 10µm (F-I'').

Figure 2, Javed et al.

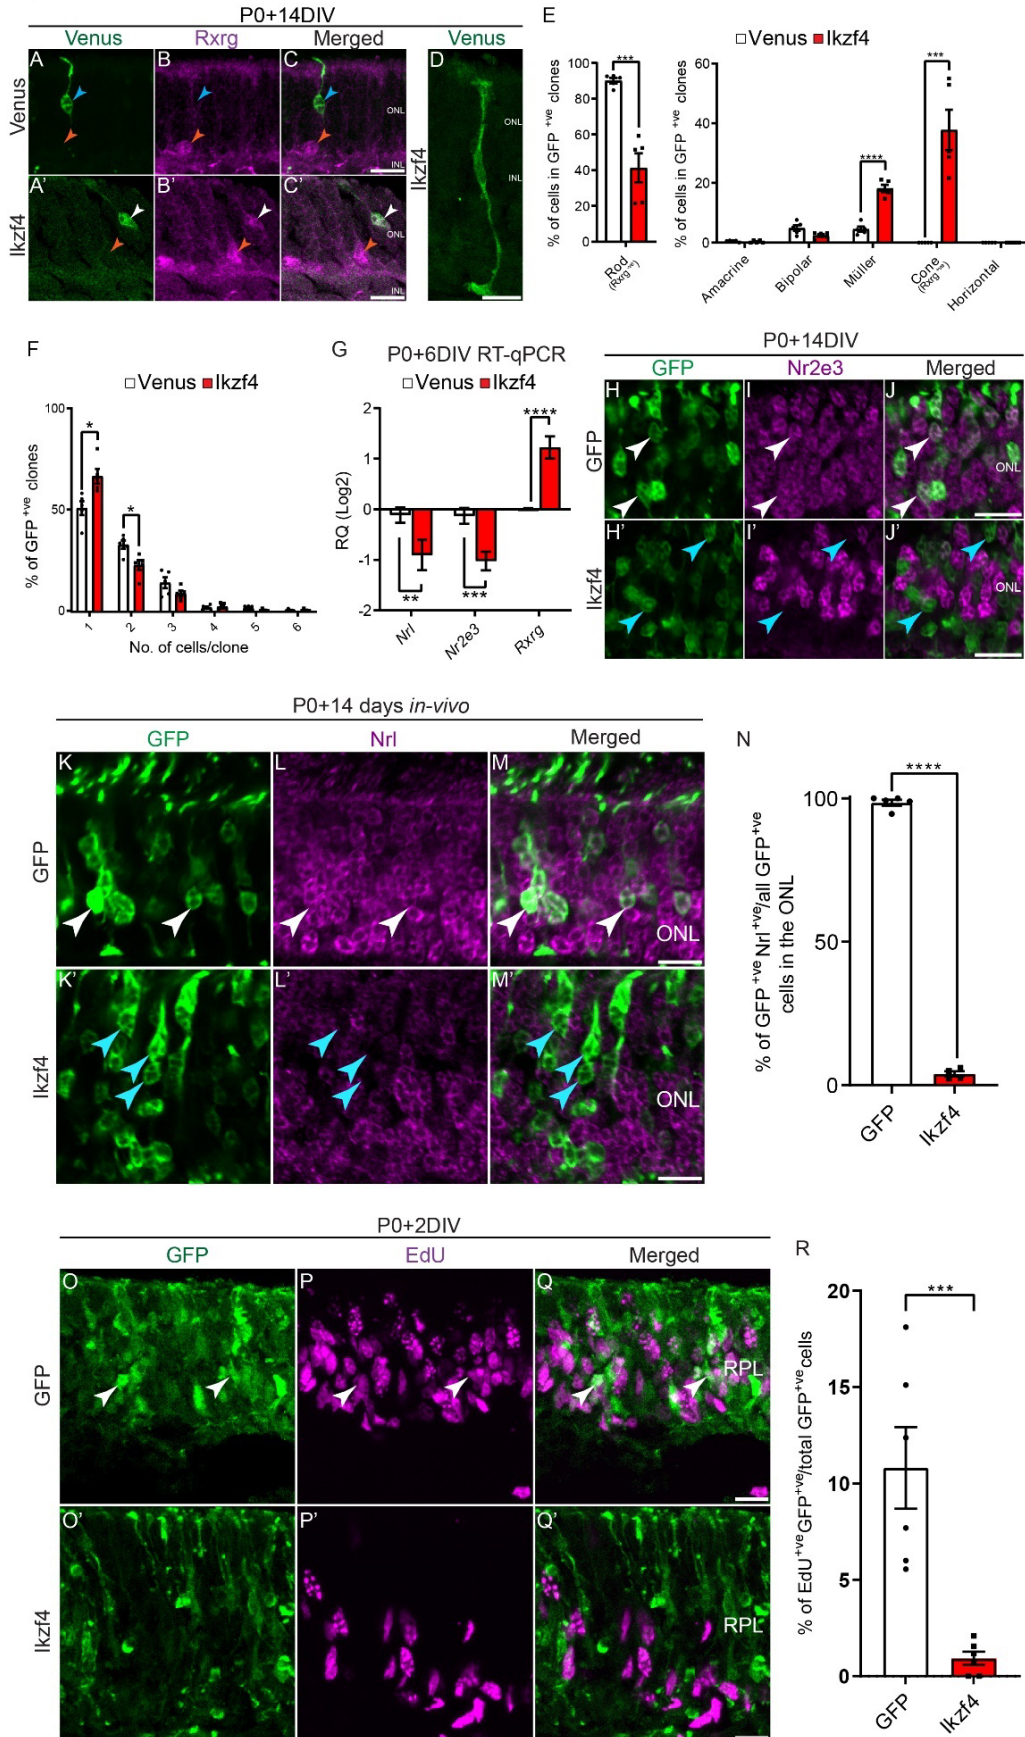

**Figure 2: *Ikzf4* promotes cones and Müller glia fate specification from late-stage RPCs.**

(A-C) Examples of clones obtained after infection with retroviral vectors expressing Venus (A-C) and *Ikzf4*-IRES-Venus (A'-C') co-immunostained with *Rxrg* (B-B'), a cone marker. (D) Example of Müller glia generated by *Ikzf4* retroviral infection. (E-F) Retroviral lineage analysis of Venus control (469 clones counted) and *Ikzf4*-IRES-Venus (388 clones counted) overexpression in late-stage retinas. (E) Quantifications for cell type analysis was based on morphology and laminar positioning of the cell bodies in the retina (Venus, n=5; *Ikzf4*, n=5). Cones (*Rxrg*<sup>+ve</sup>) and rods (*Rxrg*<sup>-ve</sup>) were counted in the ONL based on *Rxrg* expression. (F) Quantifications of the number of cells per clone for the data presented in (E). (G) RT-qPCR analysis of *Nrl*, *Nr2e3* and *Rxrg* expression from sorted GFP<sup>+ve</sup> cells 6 days after electroporation of P0 retinal explants with either GFP (n=5) or *Ikzf4* (n=5). (H-J') Examples of retinal explants electroporated at P0 with either GFP (H-J) or *Ikzf4*-IRES-GFP (H'-J') and immunostained for *Nr2e3* (I-I') 14 days later. White arrows represent electroporated cells positive for *Nr2e3* and cyan arrow represent electroporated cells without *Nr2e3* immunostaining. (K-M') Examples of retinas electroporated *in vivo* with either GFP (K-M) or *Ikzf4* (K'-M') and immunostained for *Nrl* (L-L') 14 days after electroporation. White arrows label GFP<sup>+ve</sup>*Nrl*<sup>+ve</sup> cells; cyan arrows label GFP<sup>+ve</sup>*Nrl*<sup>-ve</sup> cells. (N) Quantification of the number of GFP<sup>+ve</sup>*Nrl*<sup>+ve</sup> cells (GFP, n=5; *Ikzf4*, n=4). (O-Q') Examples of P0 retinal explants electroporated with either GFP (O-Q) or *Ikzf4* (O'-Q'), with 30μM EdU added to the culture medium 2 days later. Retinal explants were immunostained with EdU after fixation. White arrows indicate GFP<sup>+ve</sup>EdU<sup>+ve</sup> cells. (R) Quantifications of the number of EdU<sup>+ve</sup>GFP<sup>+ve</sup> cells (GFP (593 cells counted), n=6; *Ikzf4* (676 cells counted), n=6). \*p<0.05, \*\*p<0.01, \*\*\*p<0.001, \*\*\*\*p<0.0001. Statistics: Two-tailed unpaired t-test (E-F, N, R), Mann-Whitney test (G). RPL: Retinal progenitor layer. ONL: Outer nuclear layer. INL: Inner nuclear layer. RQ: Relative quantitation. Scale bars: 10μm (A-D, H-J', K-M', O-Q').

Figure 3, Javed et al.

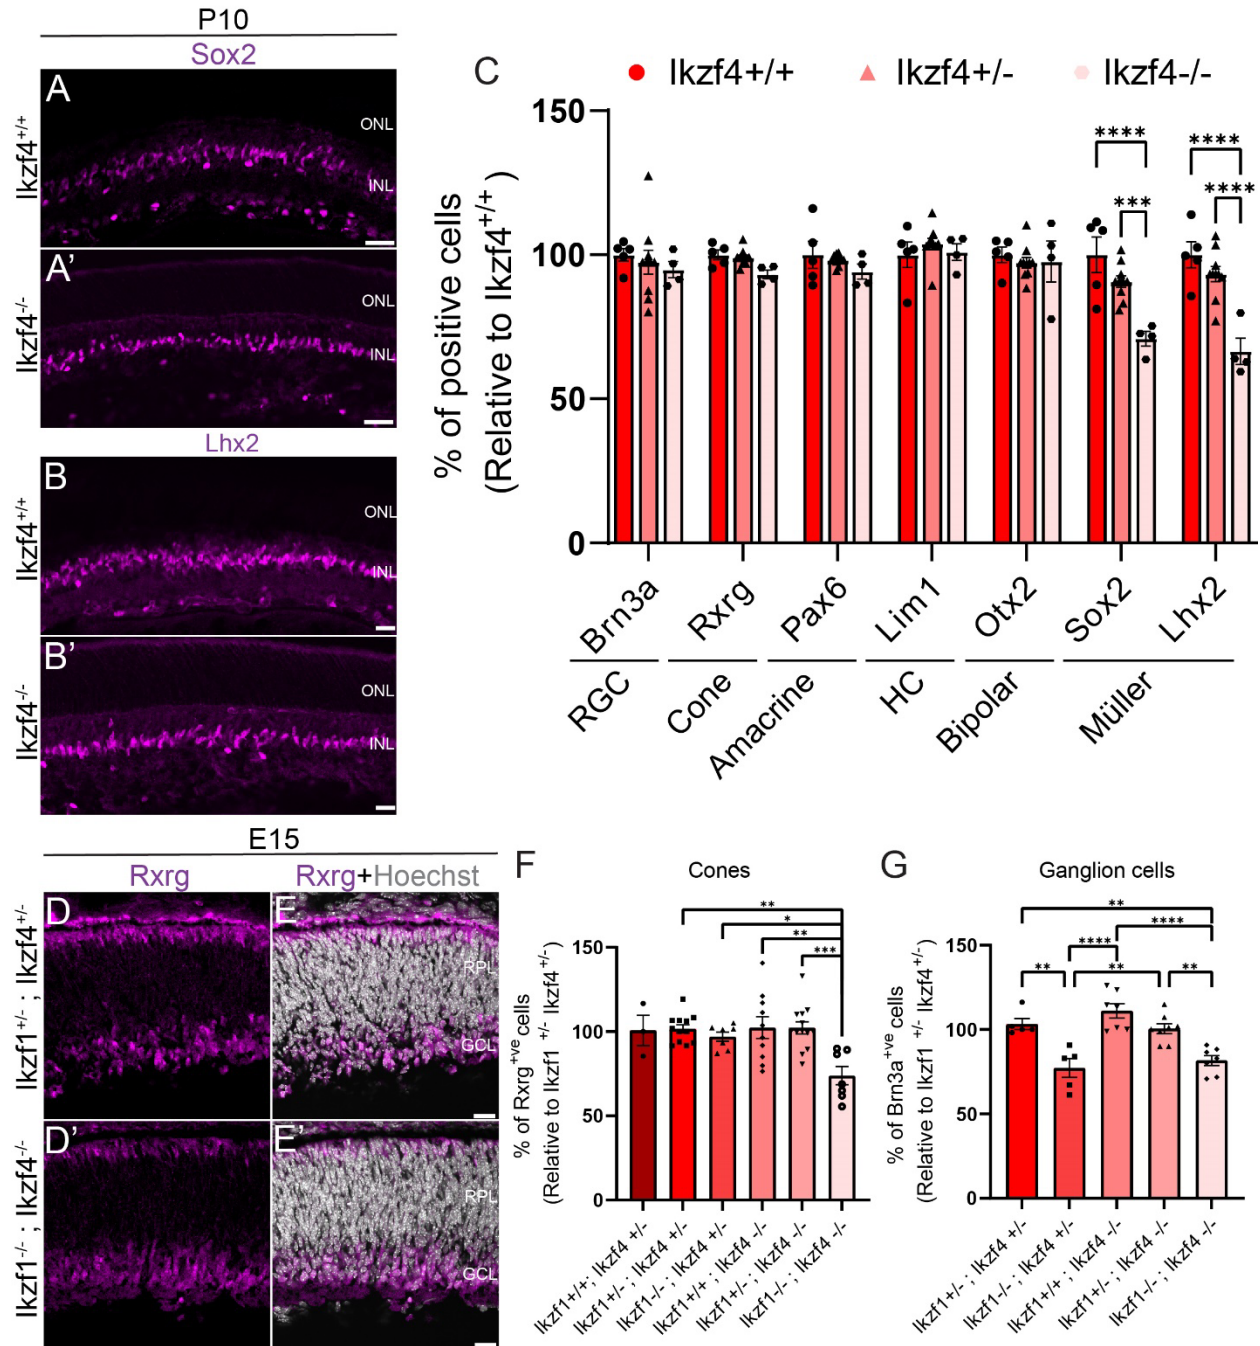

**Figure 3: Combinatorial requirement for *Ikzf1* and *Ikzf4* in the production of cones during early retinogenesis and Müller glia during late retinogenesis.**



(A-C) Examples of Sox2 (A-A') and Lhx2 (B-B') immunostaining in either  $Ikzf4^{+/+}$  (A-B) or  $Ikzf4^{-/-}$  (A'-B') mouse retinas at P10. (C) Quantifications of various retinal cell types using specific markers in either  $Ikzf4^{+/+}$  (n=7),  $Ikzf4^{+/-}$  (n=13) or  $Ikzf4^{-/-}$  (n=7) mouse retinas. (D-E') Examples of Rxrg (D-D') immunostaining in either  $Ikzf1^{+/-}Ikzf4^{+/-}$  (D-E) or  $Ikzf1^{-/-}Ikzf4^{-/-}$  (D'-E') mouse retinas at E15. (F) Quantifications of Rxrg<sup>+ve</sup> cells in either  $Ikzf1^{+/+}Ikzf4^{+/-}$  (n=3),  $Ikzf1^{+/-}Ikzf4^{+/-}$  (n=12),  $Ikzf1^{-/-}Ikzf4^{+/-}$  (n=7),  $Ikzf1^{+/+}Ikzf4^{-/-}$  (n=10),  $Ikzf1^{+/-}Ikzf4^{-/-}$  (n=13) or  $Ikzf1^{-/-}Ikzf4^{-/-}$  (n=7) mouse retinas. (G) Quantifications of Brn3a<sup>+ve</sup> cells in either  $Ikzf1^{+/-}Ikzf4^{+/-}$  (n=5),  $Ikzf1^{-/-}Ikzf4^{+/-}$  (n=5),  $Ikzf1^{+/+}Ikzf4^{-/-}$  (n=7),  $Ikzf1^{+/-}Ikzf4^{-/-}$  (n=8) or  $Ikzf1^{-/-}Ikzf4^{-/-}$  (n=7) mouse retinas. \*p<0.05, \*\*p<0.01, \*\*\*p<0.001, \*\*\*\*p<0.0001. Statistics: One-way ANOVA with Tukey correction (C, F-G). RPL: Retinal progenitor layer. ONL: Outer nuclear layer. INL: Inner nuclear layer. GCL: Ganglion cell layer. Scale bars: 10 $\mu$ m (A-B', D-E').

Figure 4, Javed et al.

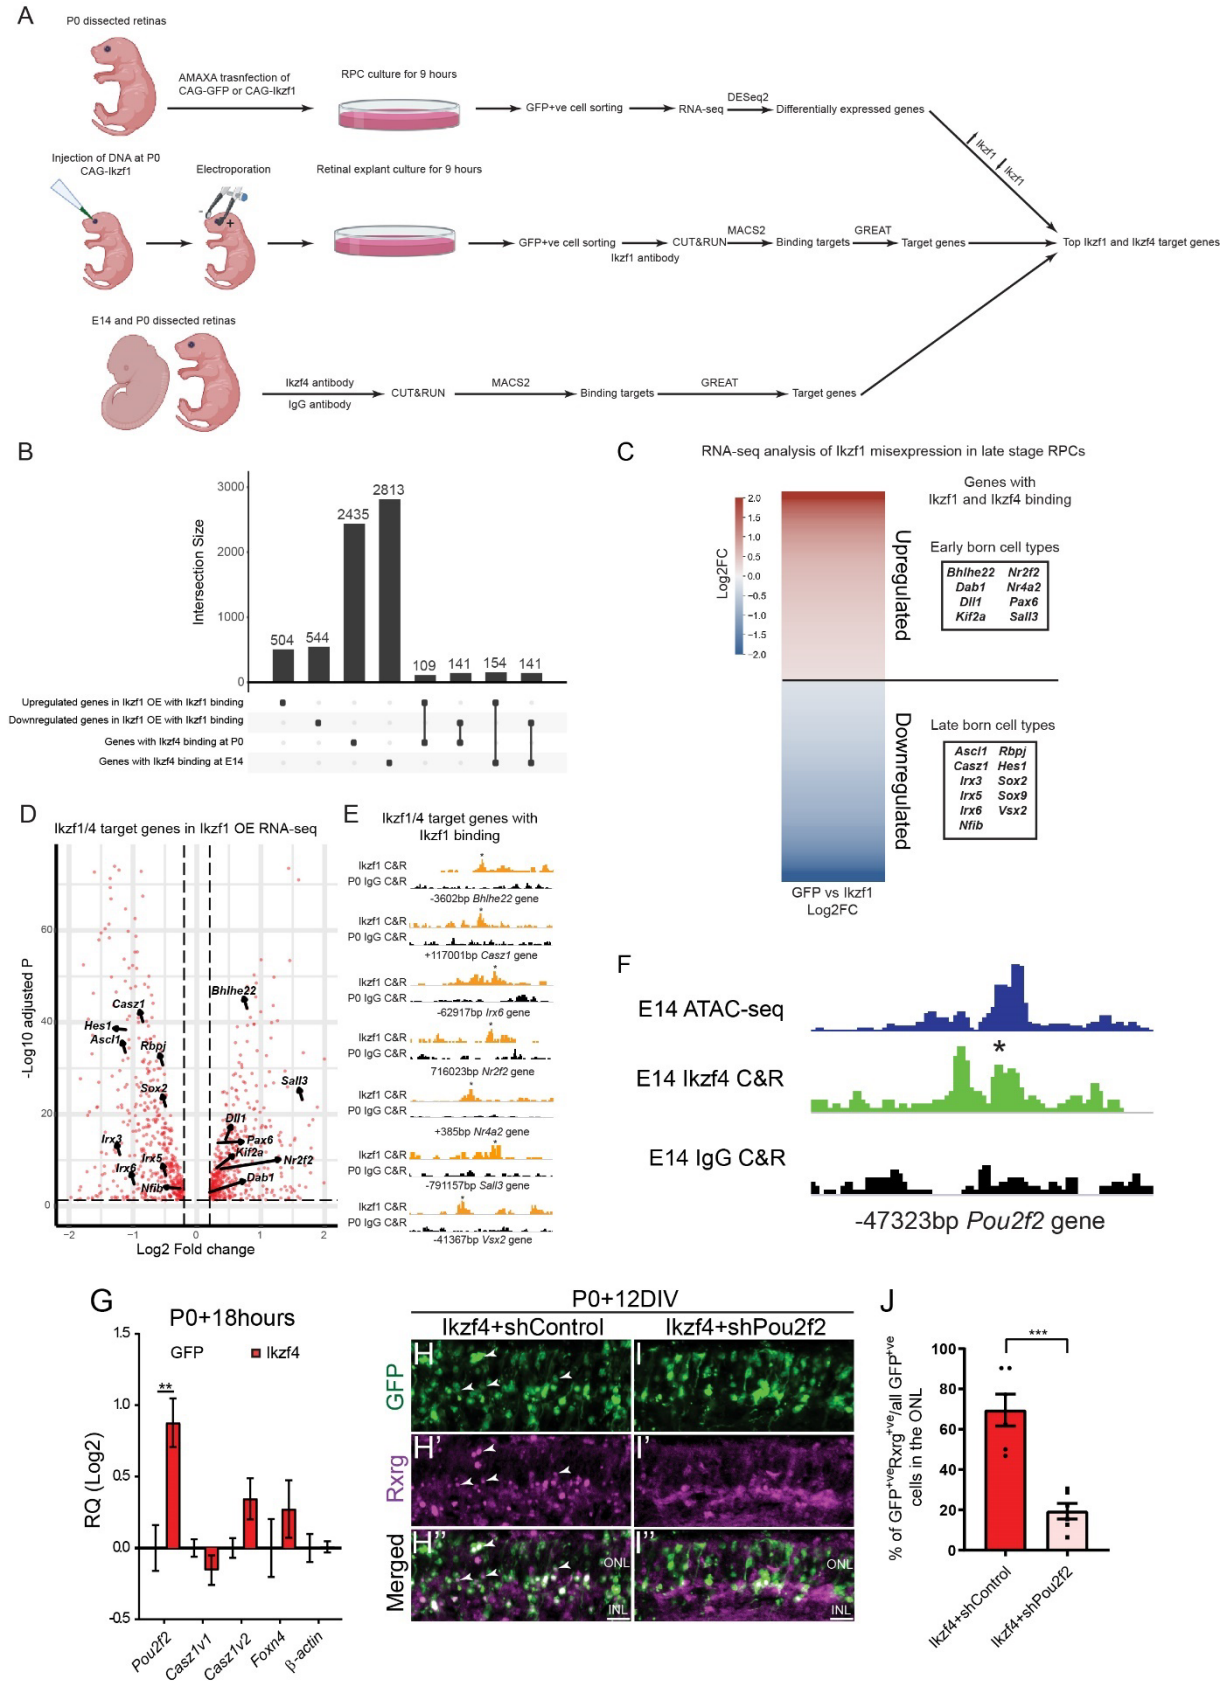

**Figure 4: *Ikzf1* and *Ikzf4* bind to target genes involved in early-born cell type production.**

(A) Schematic showing how the experiment in (B-F) was performed. (B) Upset plot representing the overlap between up/downregulated genes following *Ikzf1* OE with *Ikzf1* binding and genes bound by *Ikzf4* at E14 and P0. (C) Heatmap showing the top upregulated and downregulated genes in the RNA-seq analysis of *Ikzf1* overexpression bound by *Ikzf1* and *Ikzf4* at either E14 or P0. (D) Volcano plot showing highlighted genes from (C) projected on the *Ikzf1* RNA-seq data. (E) Genomic tracks of *Ikzf1* CUT&RUN (orange) and P0 control IgG (black) on early and late genes found in (C-D). Asterisks indicate called peak. (F) Genomic tracks of ATAC-seq at E14 in blue (Aldiri et al. 2017), *Ikzf4* CUT&RUN peaks at E14 in green, IgG Control CUT&RUN at E14 in black at genomic location of 47323bp upstream from the *Pou2f2* promoter. Asterisk indicates called peak. (G) RT-qPCR analysis *Pou2f2*, *Casz1v1*, *Casz1v2*, *Foxn4* or  $\beta$ -*actin* from sorted GFP<sup>+ve</sup> cells 18hours after electroporation of P0 retinal explants with either GFP (n=5) or *Ikzf4* (n=5). (H-I'') Examples of retinal explants electroporated at P0 with *Ikzf4*-IRES-GFP and either shControl (H-H'') or sh*Pou2f2* (I-I'') and immunostained for Rxrg (H'-I'). White arrows indicate GFP<sup>+ve</sup>Rxrg<sup>+ve</sup> cells in the ONL. (J) Quantification of GFP<sup>+ve</sup>Rxrg<sup>+ve</sup> cells in the ONL (*Ikzf4*+shControl, n=6; *Ikzf4*+sh*Pou2f2*, n=6). Statistics: Mann-Whitney test (E), Two-tailed unpaired t-test (H). RQ: Relative quantitation. ONL: Outer nuclear layer. INL: Inner nuclear layer. Scale bars: 10 $\mu$ m.

Figure 5, Javed at al.

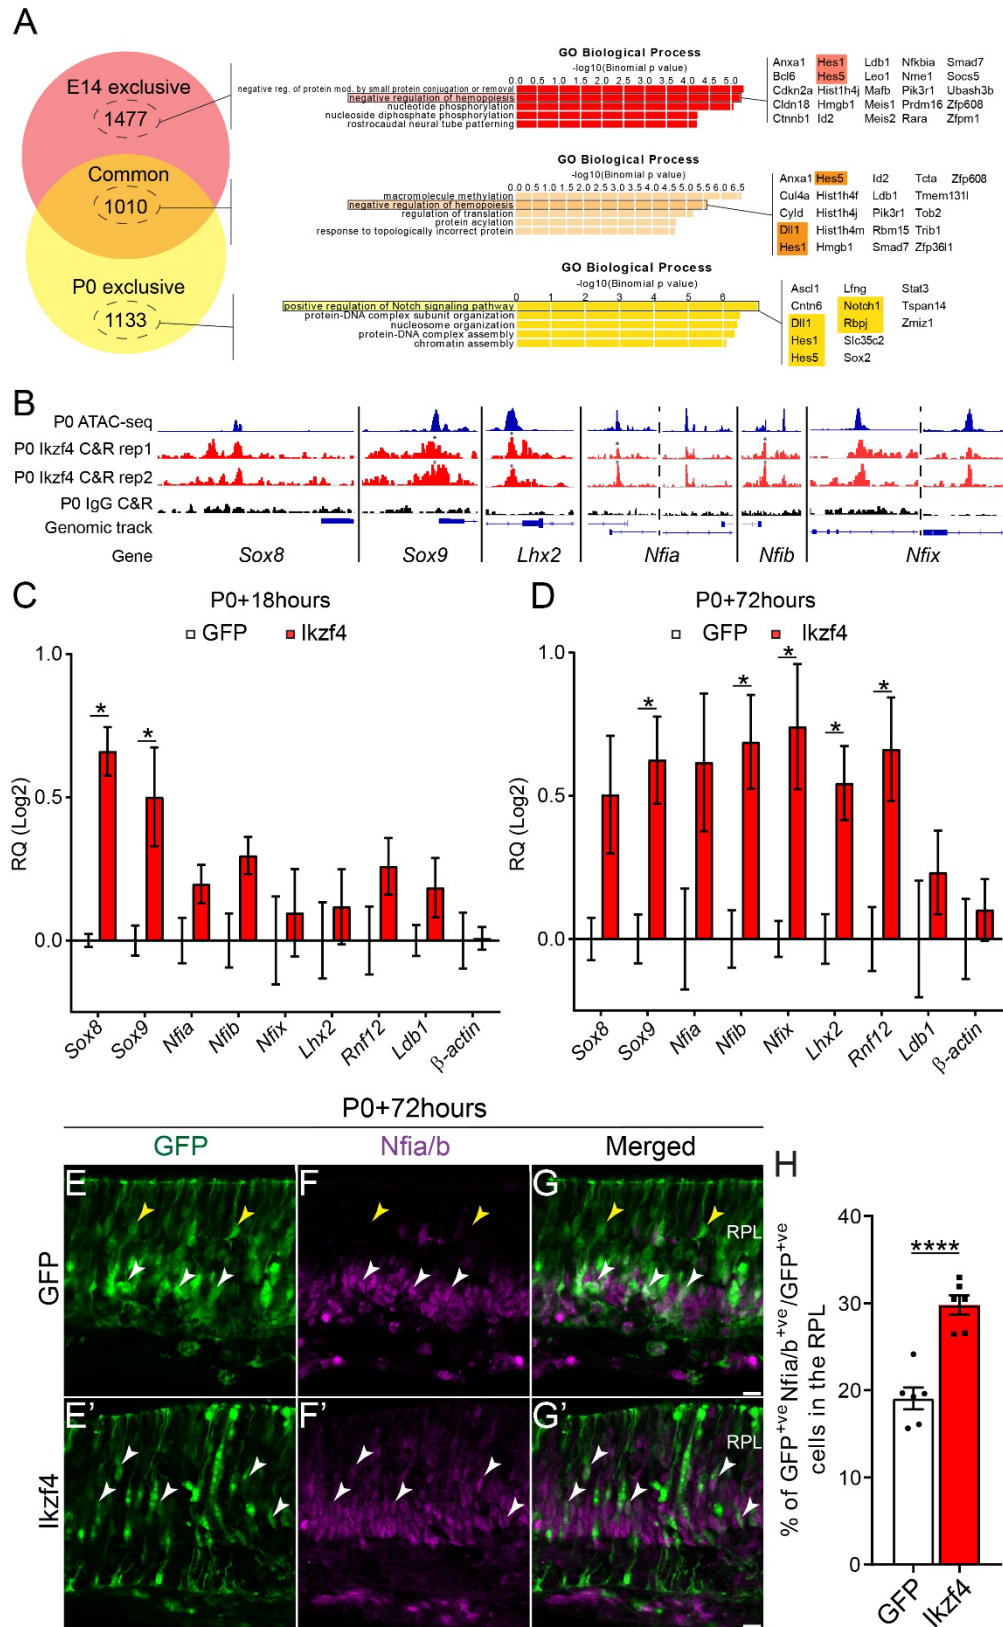

**Figure 5: Ikzf4 binds and regulates expression of Müller specification genes.**

(A) Venn diagram representing the overlap of the number of Ikzf4 binding peaks between E14 and P0. Gene Ontology classification of the genes in proximity of Ikzf4 binding peaks. GO terms and associated notch signaling genes in the list are highlighted and displayed on the right. (B) Genomic peaks of P0 ATAC-seq (Aldiri et al., 2017), P0 Ikzf4 CUT&RUN replicate 1, P0 Ikzf4 CUT&RUN replicate 2, P0 IgG CUT&RUN at genomic tracks of Sox8, Sox9, Lhx2 and Nfi family members. Asterisks represent peaks called by MACS2. (C-D) RT-qPCR analysis of Müller specification gene expression from sorted GFP<sup>+ve</sup> cells either 18 (C) or 72hours (D) after electroporation of P0 retinas with either GFP (n=5) or Ikzf4-IRES-GFP (n=5). (E-G') Examples of GFP or Ikzf4-IRES-GFP electroporations at P0 and immunostained for Nfia/b 72 hours later. (H) Quantifications of GFP<sup>+ve</sup>Nfia/b<sup>+ve</sup> cells 72 hours after electroporation in P0 retinas (GFP, n=6; Ikzf4, n=6). \*p<0.05, \*\*\*\*p<0.0001. Statistics: Mann-Whitney test (C). Two-tailed unpaired t-test (G). RPL: Retinal progenitor layer. RQ: Relative quantitation. Scale bars: 10µm (D-F').



Yellow highlighted area is 500bp around the promoter region of Hes1. (E) Schematic representation of experiment shown in (F-T'). Retinal explants were co-electroporated with either pCAG-GFP or pCAG-Ikzf4-IRES-GFP along with vectors expressing dsRed under the control of either WT Hes promoter (pHes1-dsRed), Hes1 promoter with mutation at first 'GGAA' site (mut1), second 'GGAA' site (mut2), third 'GGAA' (mut3) site and second and third GGAA mutations together (mut2+mut3). (F-T') Photomicrographs of retinal flatmounts showing increase in dsRed expression when Ikzf4-IRES-GFP is co-electroporated with either pHes1-dsRed (F'-H'), pHes1-mut1-dsRed (I'-K'), pHes1-mut2-dsRed (L'-N'), pHes1-mut3-dsRed (O'-Q') but not with pHes1-mut2+3-dsRed (R'-T') compared to the control GFP (F-G, I-K, L-N, O-Q, R-T). Statistics: Two tailed unpaired t-test (C). \*\*p<0.01. RPL: Retinal progenitor layer. Scale bars: 10µm (A-B"), 250µm (F-T').

Figure 7, Javed et al.

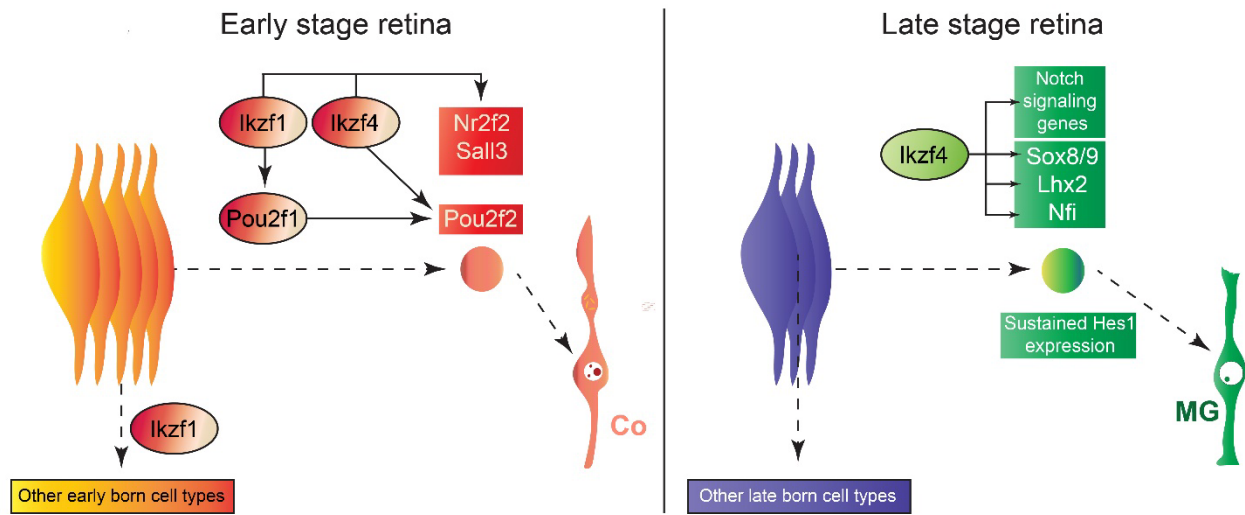

**Figure 7: Model of temporal patterning during mouse retinogenesis.**

In early RPCs, Ikzf4 functions redundantly with Ikzf1 to confer competence for cone (Co) production, whereas Ikzf1 regulates competence for production of other early-born cell types. In late RPCs, Ikzf4 acts as a classical fate determinant by binding and upregulating expression of Müller specification genes as well as instigating the maintenance of Notch signaling to ensure the Müller glia (MG) fate commitment.
